# Supplementary material for: Brain-wide transcriptome-based metabolic alterations in Parkinson's disease: human inter-region and human-experimental model correlations
Source: Royal Society of Chemistry journal article supplement (doi:10.1039/d2mo00343k), 2023-03-07
Supplement: d2mo00343k1.pdf [file d2mo00343k1.pdf]

## Supplementary Figure S2: Cluster characterization using the pathway score approach.

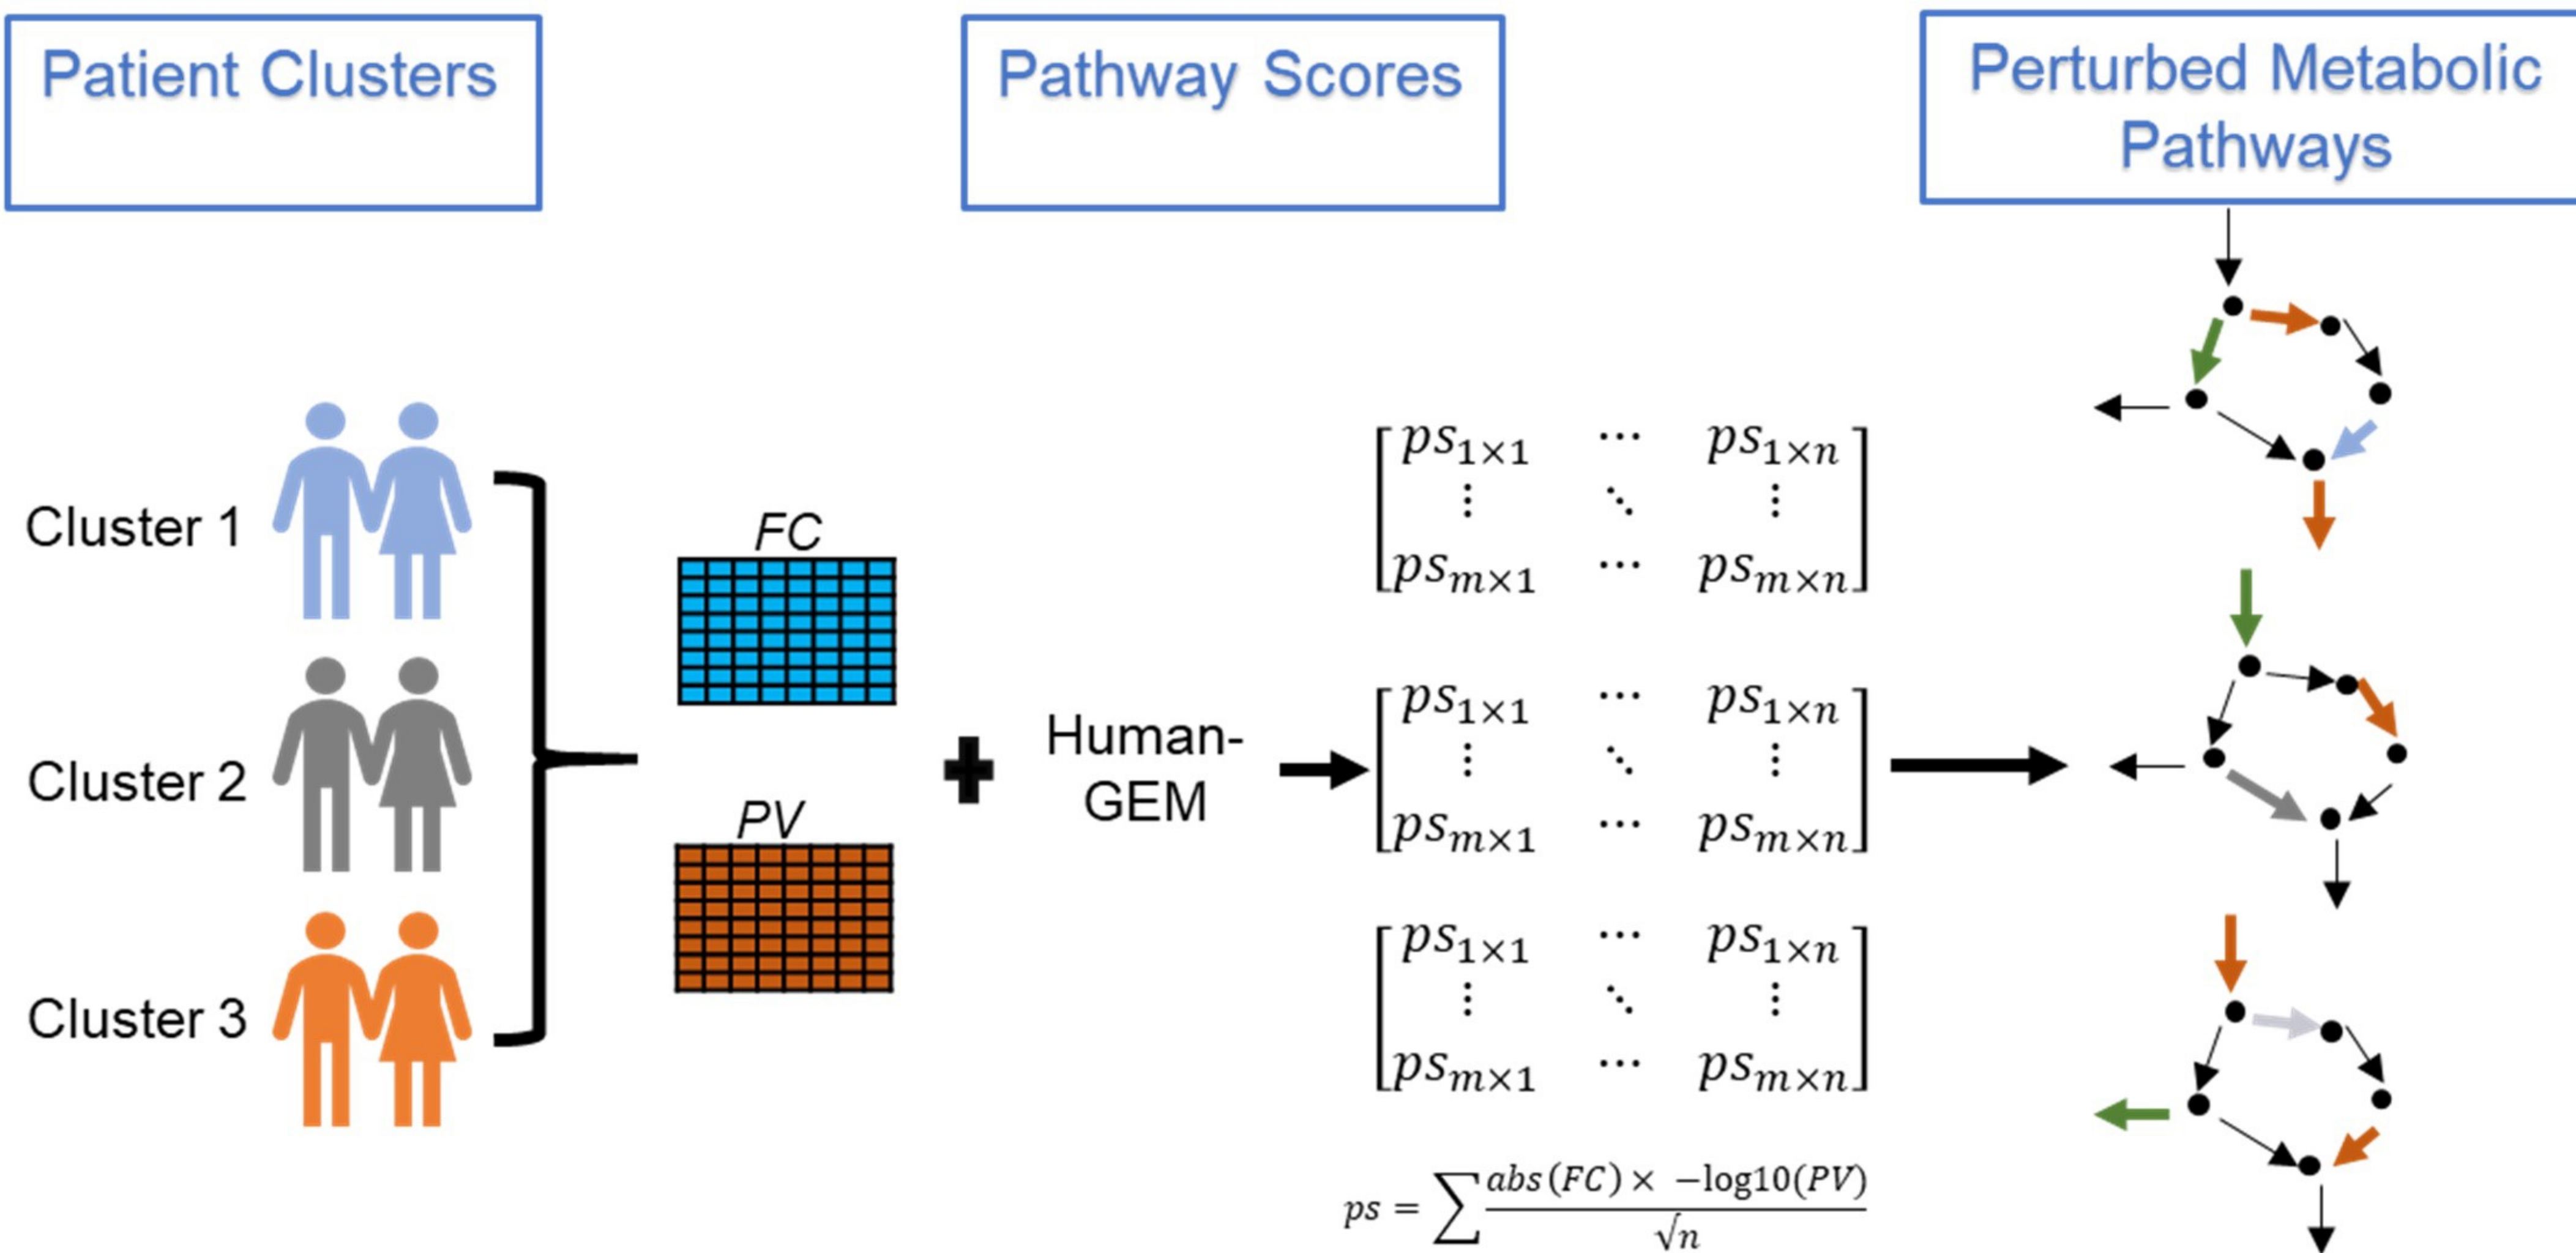

FC: gene fold change, PV: gene p-value.
