# Supplementary material for: Brain-wide transcriptome-based metabolic alterations in Parkinson's disease: human inter-region and human-experimental model correlations
Source: Royal Society of Chemistry journal article supplement (doi:10.1039/d2mo00343k), 2023-03-07
Supplement: d2mo00343k2.pdf [file d2mo00343k2.pdf]

# Supplementary Figure S3: Clustering brain tissues using Pearson correlation as the distance metric.

(a)

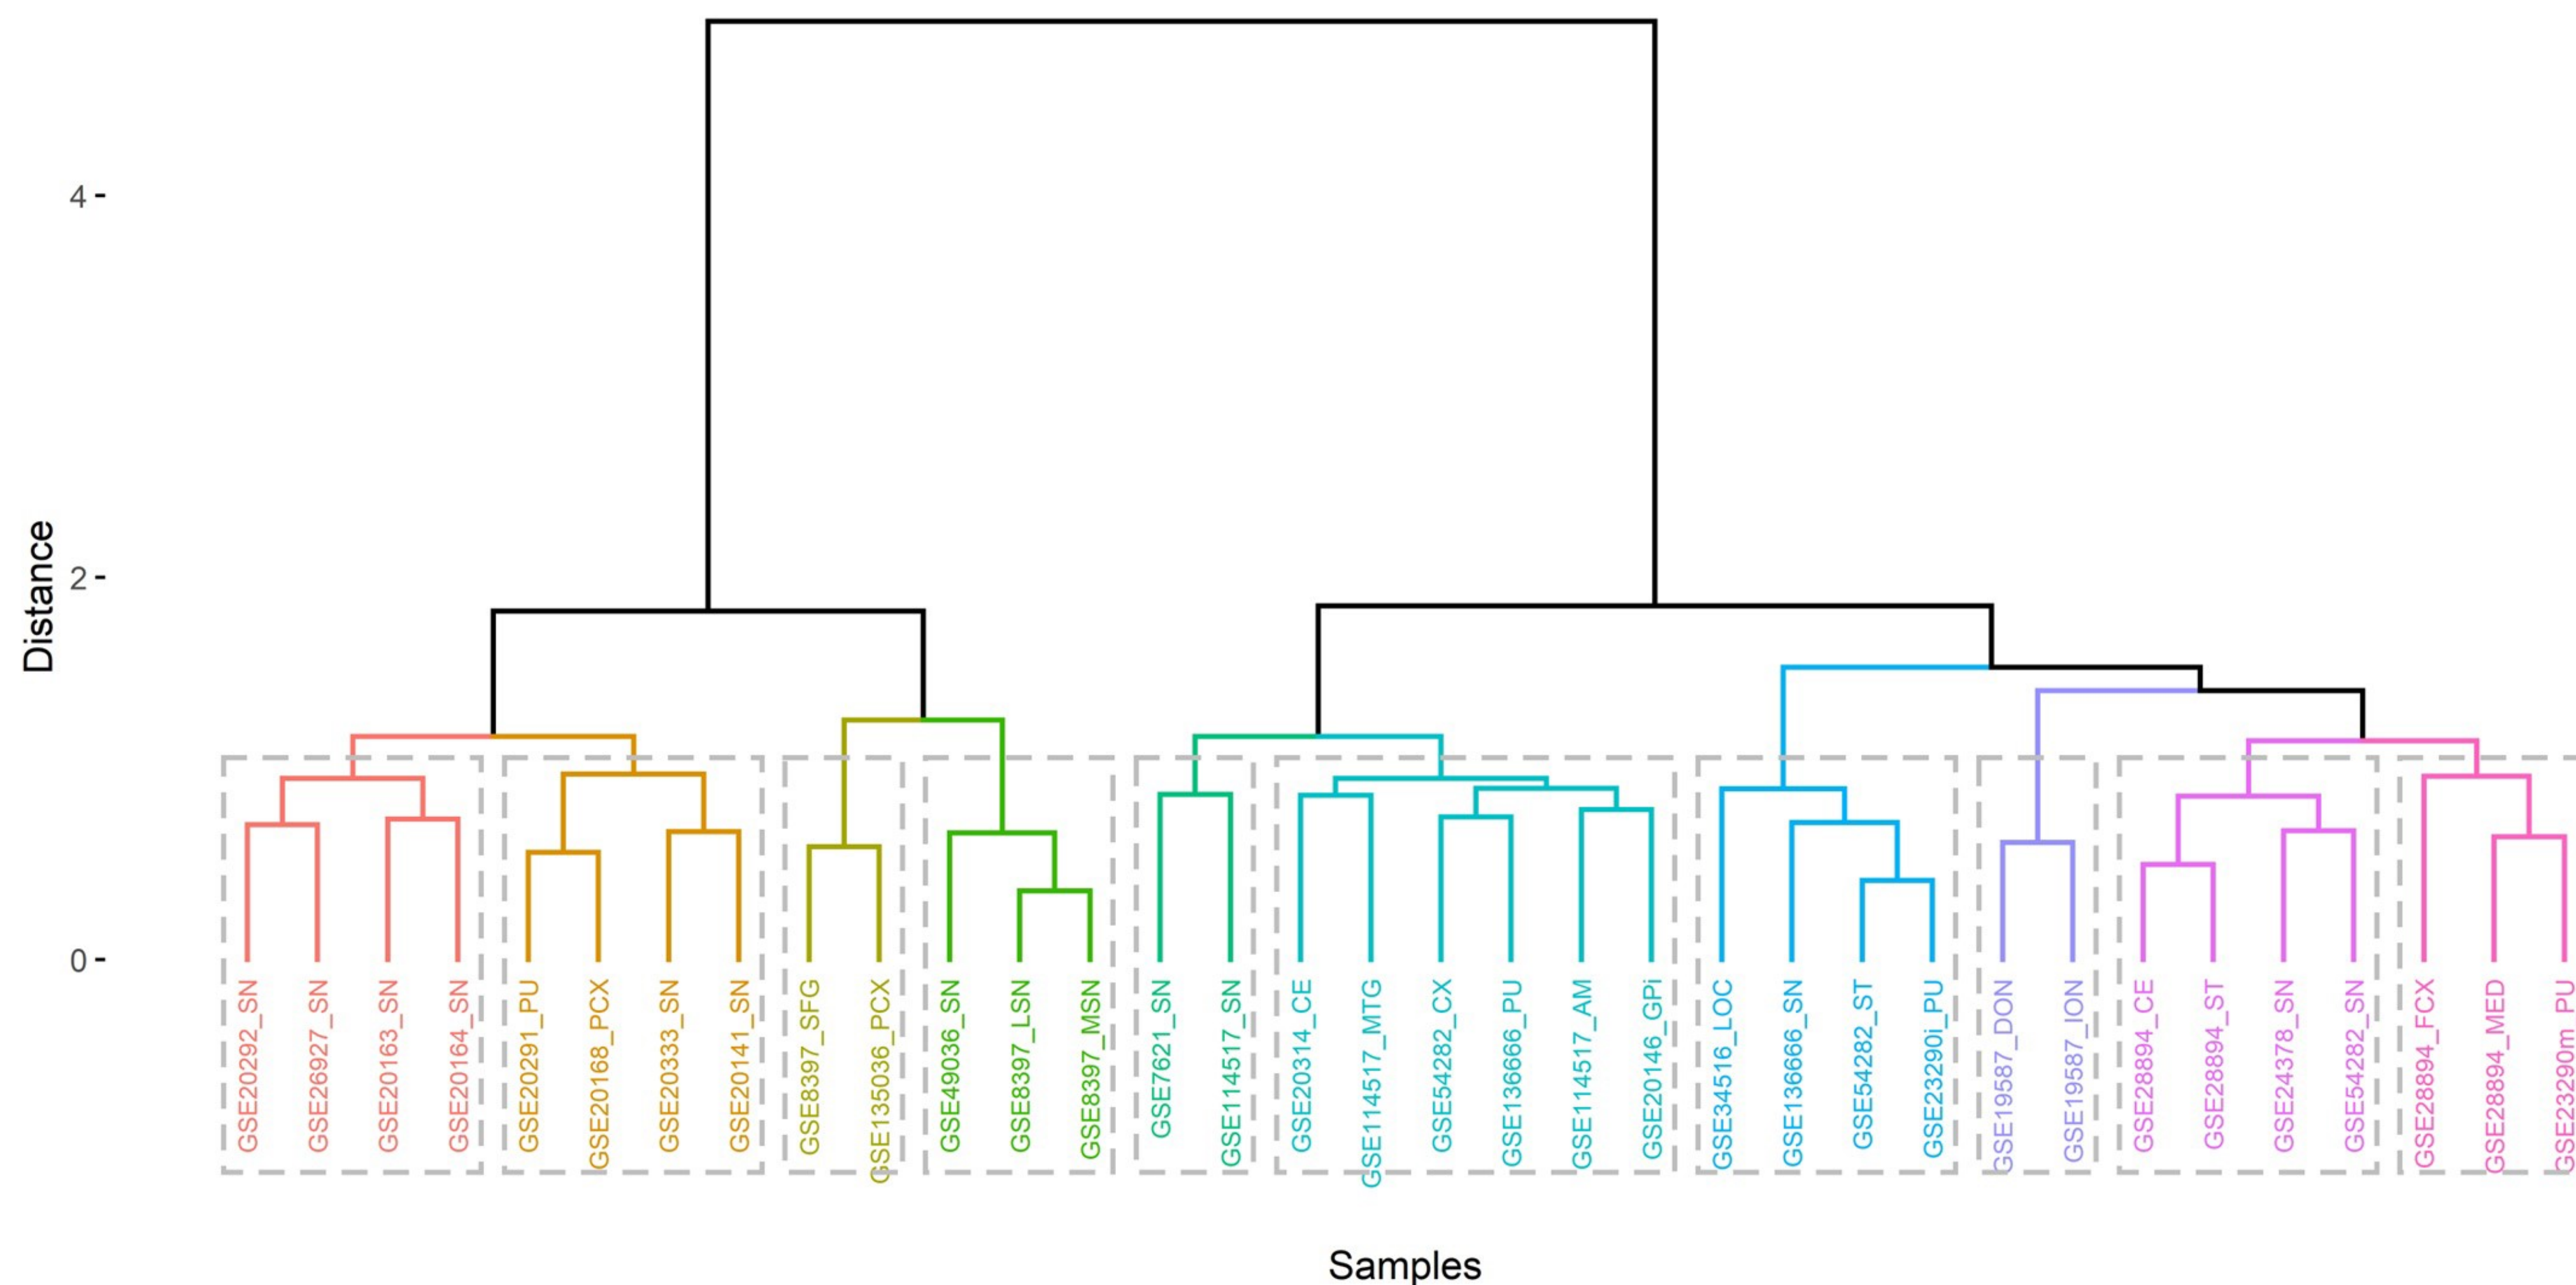

(b)

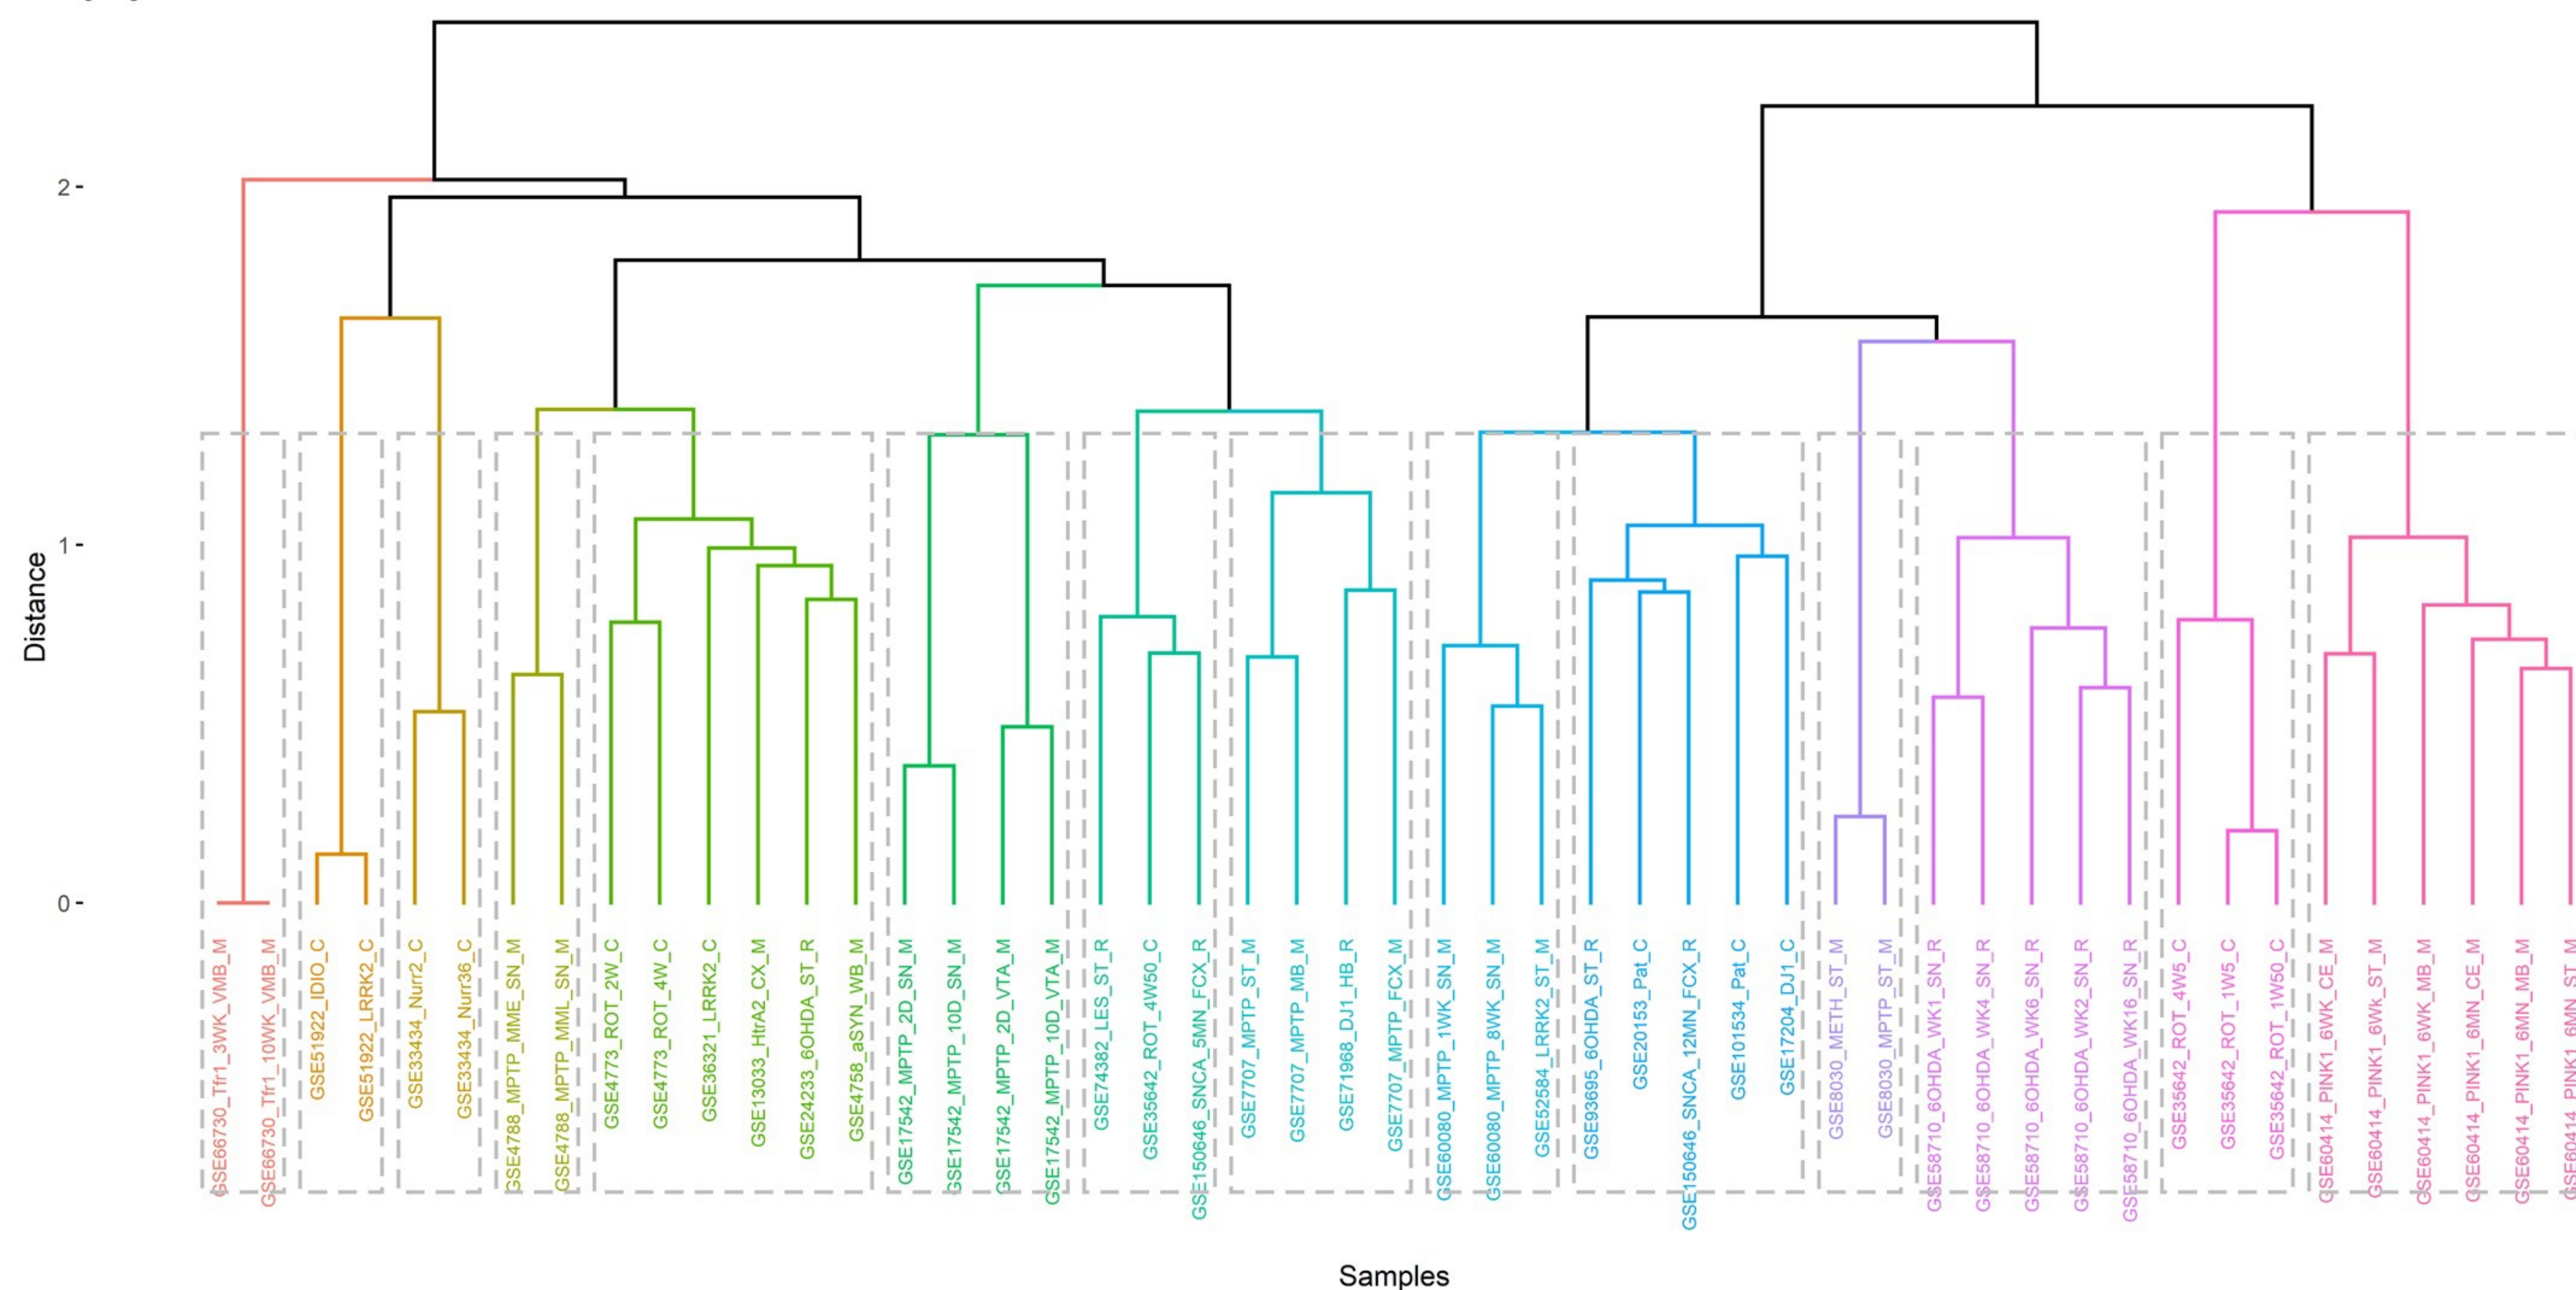

(a) human datasets (b) experimental model datasets. 729 genes, a subset of the 1525 genes used in clustering human datasets, were used in the clustering analysis of the experimental models.
