# Supplementary material for: Brain-wide transcriptome-based metabolic alterations in Parkinson's disease: human inter-region and human-experimental model correlations
Source: Royal Society of Chemistry journal article supplement (doi:10.1039/d2mo00343k), 2023-03-07
Supplement: d2mo00343k3.pdf [file d2mo00343k3.pdf]

## Supplementary Figure S4: Correlation of gene expression between Substantia nigra and (a) DON and (b) ME.

(a)

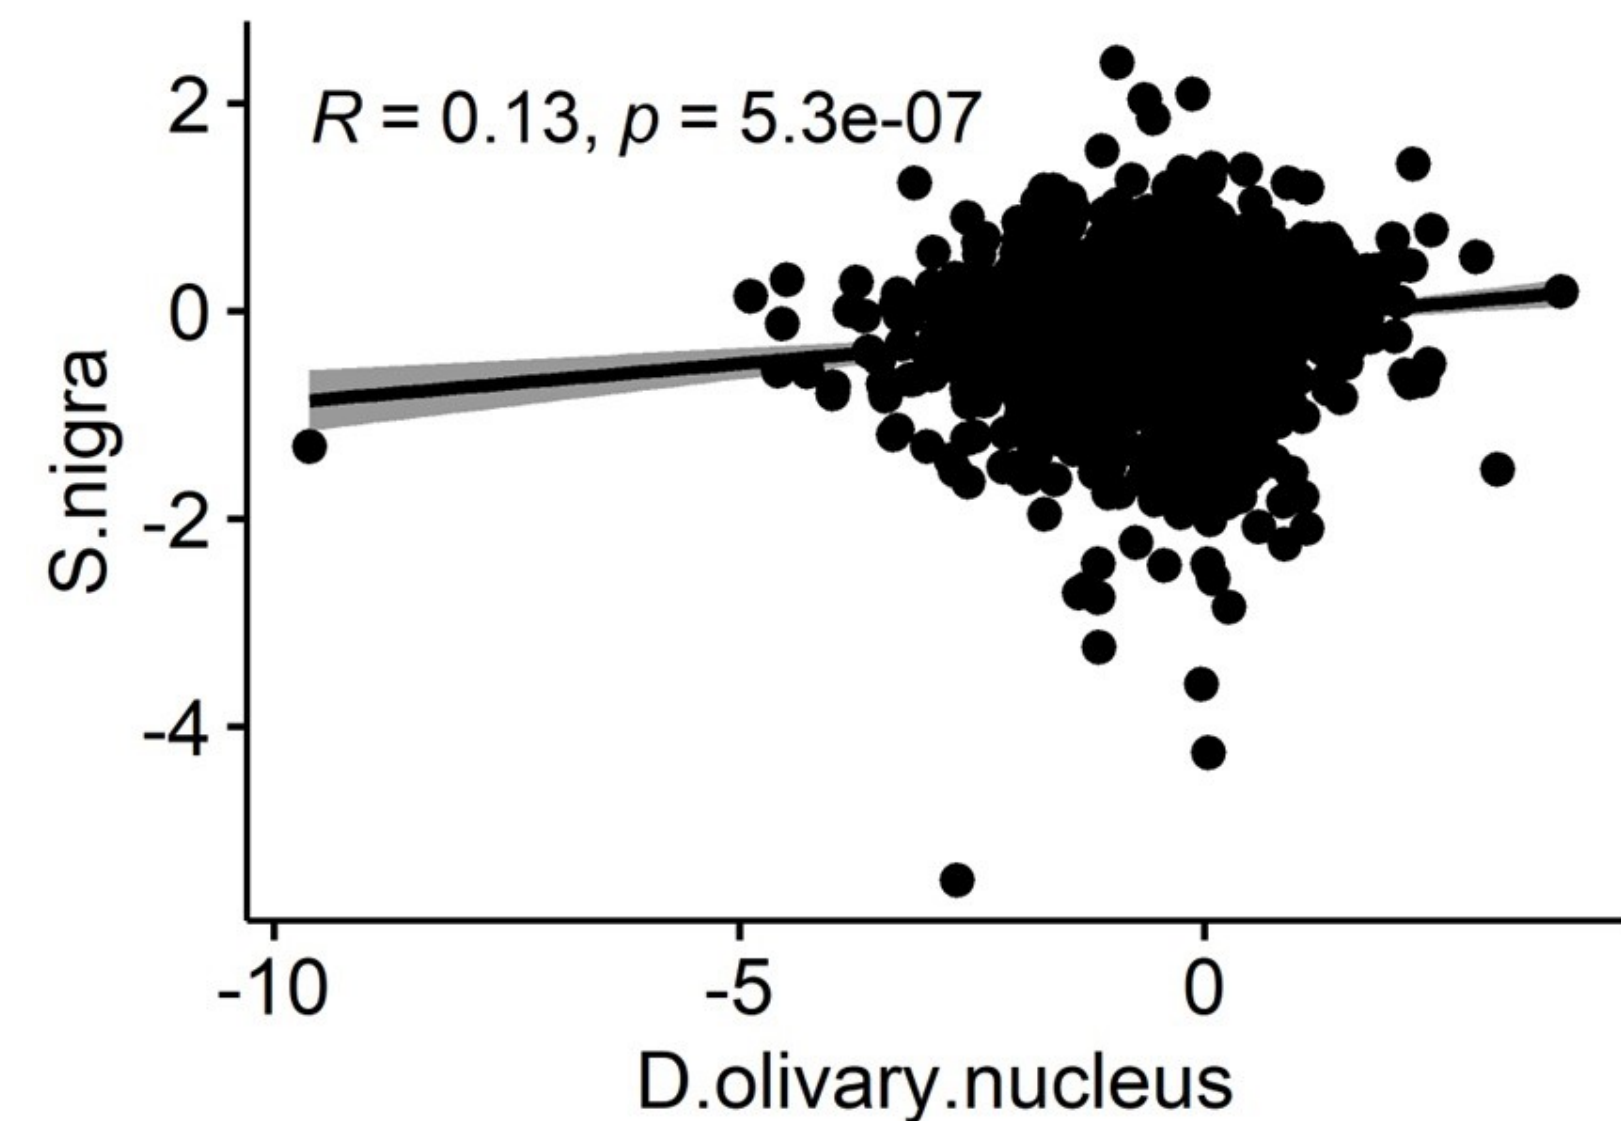

(b)

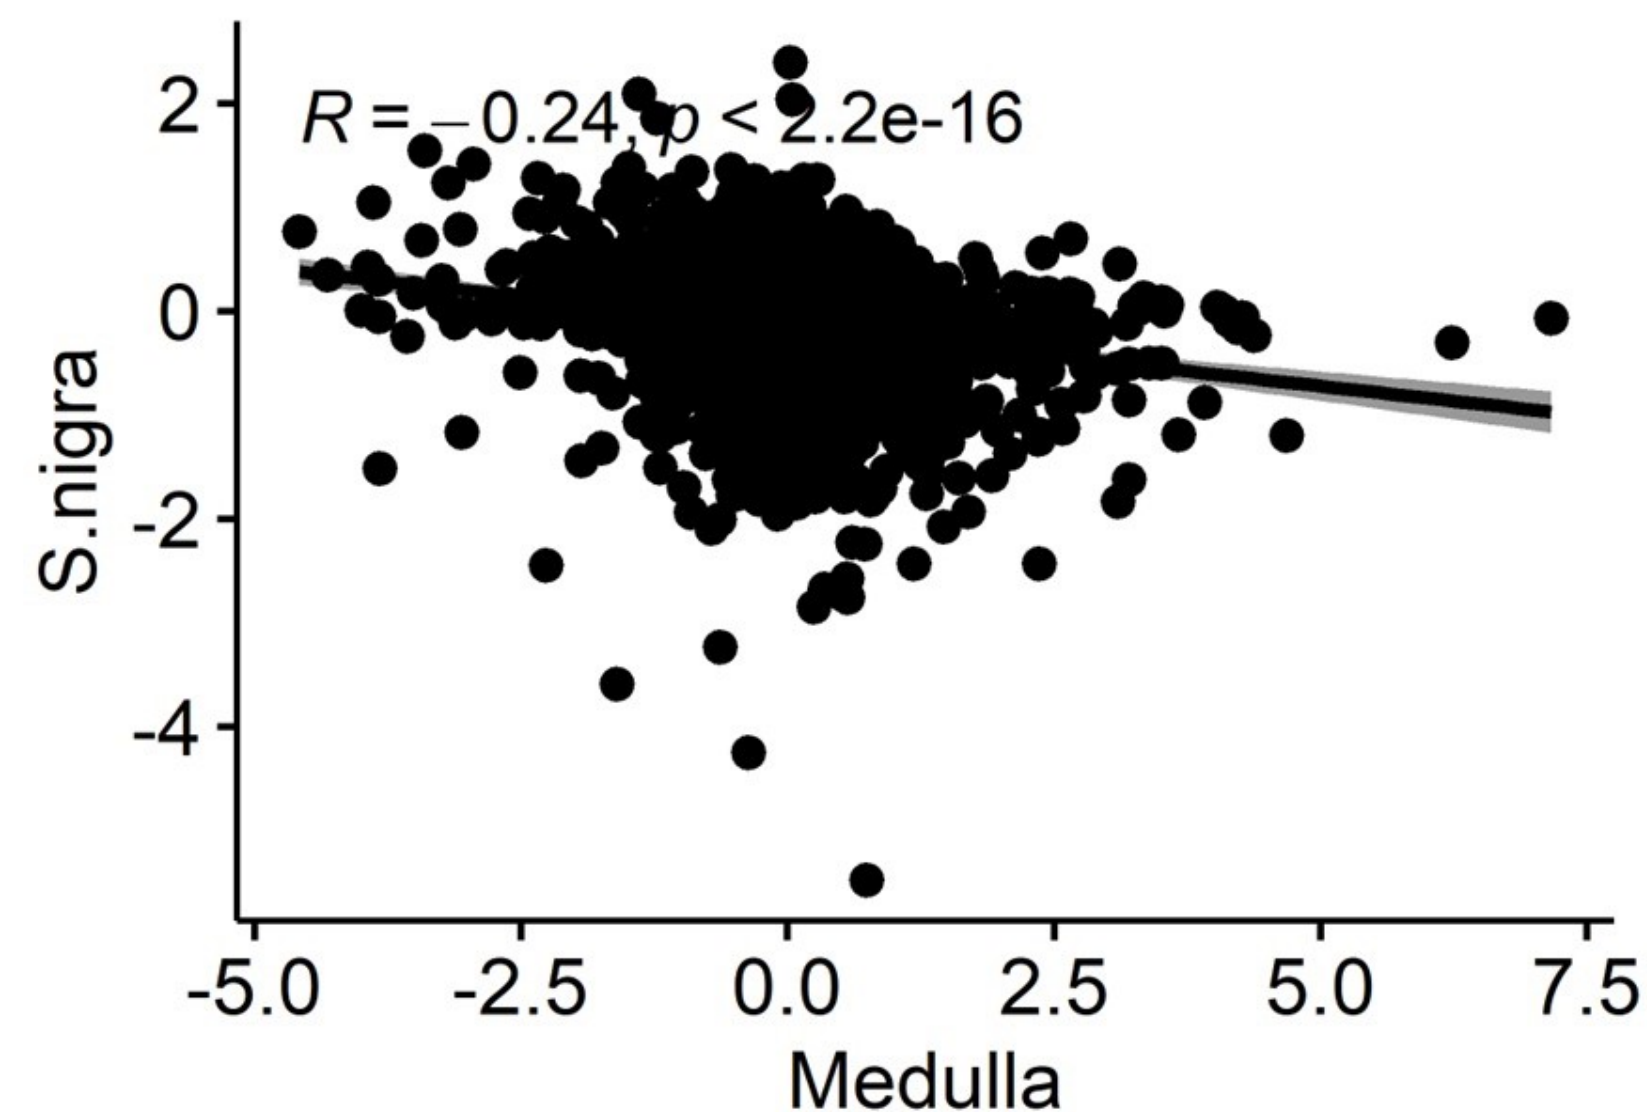

DON: Dorsal olivary nucleus, ME: Medulla. The points correspond to each gene.
