# Supplementary material for: Brain-wide transcriptome-based metabolic alterations in Parkinson's disease: human inter-region and human-experimental model correlations
Source: Royal Society of Chemistry journal article supplement (doi:10.1039/d2mo00343k), 2023-03-07
Supplement: d2mo00343k4.pdf [file d2mo00343k4.pdf]

**Supplementary Table S1:** A description of the transcriptome data sets used in the study. This table provides information regarding the brain regions investigated by the original studies as well as the data collection platform used. The references provided are for the studies published in GEO associated with the studies. In some instances, the original data publishers in GEO are different from authors of the associated studies.

| Accession No. | Description           | Genotype | Gender       | Age         | Diagnosis           | Platform                                                                      |
|---------------|-----------------------|----------|--------------|-------------|---------------------|-------------------------------------------------------------------------------|
| GSE19587      | DON<br>ION            | NA       | M -<br>F     | 78±3.15     | Control-5<br>PD-6   | Affymetrix Human Genome U133A<br>2.0 Array                                    |
| GSE34516      | LOC                   |          | M-3<br>F-7   | 75±13.26    | Control-4<br>PD-6   | Affymetrix Human Exon 1.0 ST<br>Array [transcript (gene) version]             |
| GSE136666     | SN<br>PU              |          | M<br>F       | 78±3.15     | Control<br>PD       | Illumina HiSeq 2000 (Homo<br>sapiens)                                         |
| GSE54282      | ST<br>SN<br>CO        |          | M-17<br>F-18 | 76.9±3.15   | Control-19<br>PD-14 | Affymetrix Human Gene 1.0 ST<br>Array<br>[HuGene10stv1_Hs_ENTREZG_1<br>5.0.0] |
| GSE28894      | CO<br>ST<br>FCX<br>ME |          | M-53<br>F-61 | 76.89±9.12  | Control-59<br>PD-55 | Illumina humanRef-8 v2.0<br>expression beadchip                               |
| GSE24378      | SN                    |          | NA           | 73.69±10.7  | Control-9<br>PD-8   | Affymetrix Human X3P Array                                                    |
| GSE23290      | mPU<br>iPU            |          | M-5<br>F-9   | 75.71±11.48 | Control-6<br>PD-8   | Affymetrix Human Exon 1.0 ST<br>Array [transcript (gene) version]             |
| GSE7621       | SN                    |          | M-17<br>F-8  | NA          | Control-9<br>PD-16  | Affymetrix Human Genome U133<br>Plus 2.0 Array                                |
| GSE114517     | SN                    |          | M-19         | 78.69±9.11  | Control-12          | Illumina NextSeq 500 (Homo                                                    |

|           |                   |  |              |             |                     |                                                 |
|-----------|-------------------|--|--------------|-------------|---------------------|-------------------------------------------------|
|           | AM<br>MTG         |  | F-10         |             | PD-17               | sapiens)                                        |
| GSE20146  | GP                |  | M-12<br>F-8  | NA          | Control-10<br>PD-10 | Affymetrix Human Genome U133<br>Plus 2.0 Array  |
| GSE20314  | CE                |  | M-6<br>F-2   | 83.88±2.53  | Control-4<br>PD-4   | Affymetrix Human Genome U133A<br>Array          |
| GSE20163  | SN                |  | NA           | 72.42±10.1  | Control-9<br>PD-8   | Affymetrix Human Genome U133A<br>Array          |
| GSE20164  | SN                |  | M-5<br>F-6   | 81.1±6.2    | Control-5<br>PD-6   | Affymetrix Human Genome U133A<br>Array          |
| GSE20333  | SN                |  | M-7<br>F-5   | 78±6.99     | Control-6<br>PD-6   | Affymetrix Human HG-Focus<br>Target Array       |
| GSE20141  | SN                |  | NA           | NA          | Control-8<br>PD-10  | Affymetrix Human Genome U133<br>Plus 2.0 Array  |
| GSE20292  | SN                |  | M-19<br>F-10 | 70.1±12.46  | Control<br>PD       | Affymetrix Human Genome U133A<br>Array          |
| GSE20291  | PU                |  | M-24<br>F-11 | 70.83±12.46 | Control-20<br>PD-15 | Affymetrix Human Genome U133A<br>Array          |
| GSE20168  | PCX               |  | M-18<br>F-11 | 74±9.44     | Control-15<br>PD-14 | Affymetrix Human Genome U133A<br>Array          |
| GSE8397   | SFG<br>LSN<br>MSN |  | M-31<br>F-16 | 76.21±9.85  | Control-17<br>PD-30 | Affymetrix Human Genome U133A<br>Array          |
| GSE135036 | PCX               |  | M-32<br>F-4  | 75.3±5.15   | Control-12<br>PD-24 | Illumina NextSeq 500 (Homo<br>sapiens)          |
| GSE26927  | SN                |  | M-12<br>F-8  | 74.7±13.49  | Control-8<br>PD-12  | Illumina humanRef-8 v2.0<br>expression beadchip |
| GSE49036  | SN                |  | NA           | NA          | Control-8<br>PD-15  | Affymetrix Human Genome U133<br>Plus 2.0 Array  |

|           |                                          |  |  |  |  |                                                                   |
|-----------|------------------------------------------|--|--|--|--|-------------------------------------------------------------------|
| GSE4773   | SK-N-MC<br>exposed to<br>rotenone        |  |  |  |  | Affymetrix Human Genome U133<br>Plus 2.0 Array                    |
| GSE17204  | DJ-1 mutant<br>SH-SY5Y<br>cell lines     |  |  |  |  | Affymetrix Human Genome U133A<br>2.0 Array                        |
| GSE20153  | EBV<br>transformed<br>cell lines         |  |  |  |  | Affymetrix Human Genome U133<br>Plus 2.0 Array                    |
| GSE35642  | SK-N-MC<br>exposed to<br>rotenone        |  |  |  |  | Affymetrix Human Genome U133A<br>Array                            |
| GSE36321  | LRRK2<br>mutant<br>neural stem<br>cells  |  |  |  |  | Affymetrix Human Genome U133A<br>2.0 Array                        |
| GSE101534 | LRRK2-<br>G2019S<br>mutant<br>hNES cells |  |  |  |  | Affymetrix Human Gene 2.0 ST<br>Array [transcript (gene) version] |
| GSE4788   | SN<br>exposed to<br>MPTP                 |  |  |  |  | Affymetrix Murine Genome U74A<br>Array                            |
| GSE4758   | WB<br>aSYN<br>mouse line                 |  |  |  |  | Affymetrix Mouse Genome 430 2.0<br>Array                          |
| GSE7707   | PCX-ST-                                  |  |  |  |  | Affymetrix Mouse Genome 430 2.0                                   |

|          |                                               |  |  |  |  |                                                                   |
|----------|-----------------------------------------------|--|--|--|--|-------------------------------------------------------------------|
|          | MB<br>exposed to<br>MPTP                      |  |  |  |  | Array                                                             |
| GSE8030  | ST<br>Exposed to<br>MPTP and<br>METH          |  |  |  |  | Affymetrix Mouse Expression 430A<br>Array                         |
| GSE13033 | CX<br>Mutant<br>HtrA2                         |  |  |  |  | Affymetrix Mouse Genome 430 2.0<br>Array                          |
| GSE17542 | SN-VTA<br>Exposed to<br>MPTP                  |  |  |  |  | Affymetrix Mouse Genome 430 2.0<br>Array                          |
| GSE60080 | ST<br>Exposed to<br>MPTP-HCl,<br>Saline       |  |  |  |  | Affymetrix Mouse Gene 1.0 ST<br>Array [transcript (gene) version] |
| GSE60414 | CE-MB-ST<br>Mutant<br>Pink1<br>/A53T-<br>SNCA |  |  |  |  | Affymetrix HT MG-430 PM Array<br>Plate                            |
| GSE66730 | VMB<br>Mutant Tfr1                            |  |  |  |  | Affymetrix Mouse Genome 430 2.0<br>Array                          |
| GSE52584 | ST<br>Mutant<br>LRRK2                         |  |  |  |  | Affymetrix Mouse Gene 1.0 ST<br>Array [transcript (gene) version] |
| GSE24233 | ST<br>Exposed to                              |  |  |  |  | Illumina ratRef-12 v1.0 expression<br>beadchip                    |

|           |                                        |  |  |  |  |                                                                 |
|-----------|----------------------------------------|--|--|--|--|-----------------------------------------------------------------|
|           | 6-OHDA/Saline                          |  |  |  |  |                                                                 |
| GSE58710  | SN<br>Exposed to<br>6-OHDA,<br>Vehicle |  |  |  |  | Affymetrix Rat Gene 1.0 ST Array<br>[transcript (gene) version] |
| GSE74382  | DST<br>Exposed to<br>saline            |  |  |  |  | Affymetrix Rat Genome 230 2.0<br>Array                          |
| GSE93695  | ST<br>Exposed to<br>L-DOPA             |  |  |  |  | Affymetrix Rat Gene 2.0 ST Array<br>[transcript (gene) version] |
| GSE71968  | HMB<br>Mutant DJ-1                     |  |  |  |  | Illumina HiSeq 2000 (Rattus rattus)                             |
| GSE150646 | PCX<br>Mutant<br>SNCA                  |  |  |  |  | Illumina HiSeq 2500 (Rattus norvegicus)                         |

**SN:** Substantia nigra, **ST:** Striatum, **PU:** Putamen, **GP:** Globus pallidus, **AM:** Amygdala, **CE:** Cerebellum, **ME:** Medulla oblongata, **LC:** Locus coeruleus, **DON:** Dorsal motor nucleus of the vagus, **ION:** Inferior olivary nucleus, **PCX:** Prefrontal cortex, **CX:** Whole cortex, **MTG:** Medial temporal gyrus and **SFG:** Superior frontal gyrus, **WB:** Whole Brain, **MB:** Midbrain, **VTA:** Ventral Tegmental Area, **VMB:** Ventral Midbrain, **DST:** Dorsal Striatum, **HMB:** Hemibrain. **MPTP:** 1-methyl-4-phenyl-1,2,3,6-tetrahydropyridine, **6-OHDA:** 6-hydroxy-dopamine, **METH:** Methamphetamine, **L-DOPA:** levo-dopamine, M: male, F: female.
