# Supplementary material for: Brain-wide transcriptome-based metabolic alterations in Parkinson's disease: human inter-region and human-experimental model correlations
Source: Royal Society of Chemistry journal article supplement (doi:10.1039/d2mo00343k), 2023-03-07
Supplement: d2mo00343k5.pdf [file d2mo00343k5.pdf]

**Table S2:** List of novel metabolic genes identified in the Substantia nigra that had not been previously characterised in Parkinson's disease.

| Gene ID | Gene Name                                                                        | Enzyme    | Protein Family | OMIM ID | Uniprot ID | Ontology   | PMID    | Genomic Location | RefSeq_MRNA                                                                                                     |
|---------|----------------------------------------------------------------------------------|-----------|----------------|---------|------------|------------|---------|------------------|-----------------------------------------------------------------------------------------------------------------|
| ANXA3   | annexin A3                                                                       |           | PF00191        | 106490  | P12429     | GO:0005509 | 1830024 | 4q21.21          | NM_005139                                                                                                       |
| B3GAT1  | beta-1,3-glucuronyltransferase 1                                                 | 2.4.1.135 | PF03360        | 151290  | Q9P2W7     | GO:0000139 | 8619474 | 11q25            | NM_054025,<br>NM_001367973,<br>NM_018644                                                                        |
| CAD     | carbamoyl-phosphate synthetase 2, aspartate transcarbamylase, and dihydroorotase | 3.5.2.3   | PF02787        | 114010  | F8VPD4     | GO:0001889 | 1979741 | 2p23.3           | NM_004341,<br>NM_001306079                                                                                      |
| GK      | glycerol kinase                                                                  | 2.7.1.30  | PF00370        | 300474  | B4DH54     | GO:0004370 | 2081587 | Xp21.2           | NM_001128127,<br>NM_203391,<br>NM_001205019,<br>NM_000167                                                       |
| GLTP    | glycolipid transfer protein                                                      |           | PF08718        | 608949  | A0A024RB17 | GO:0005515 | 2190982 | 12q24.11         | NM_016433                                                                                                       |
| GNE     | glucosamine (UDP-N-acetyl)-2-epimerase/N-acetylmannosamine kinase                | 2.7.1.60  | PF00480        | 269921  | Q9Y223     | GO:0004553 | 2443758 | 9p13.3           | NM_001128227,<br>NM_001190384,<br>NM_001190388,<br>NM_001374797,<br>NM_005476,<br>NM_001190383,<br>NM_001374798 |
| GUCY1B1 | guanylate cyclase 1 soluble subunit beta 1                                       | 4.6.1.2   | PF07700        | 139397  | Q02153     | GO:0004383 | 1352257 | 4q32.1           | NM_001291954,<br>NM_001291952,<br>NM_001291951,<br>NM_001291955,<br>NM_001291953,<br>NM_000857                  |
| MAP4K2  | mitogen-activated protein kinase kinase kinase kinase 2                          | 2.7.11.1  | PF00069        | 603166  | Q12851     | GO:0000139 | 7477268 | 11q13.1          | NM_001307990,<br>NM_004579                                                                                      |
| PLOD3   | procollagen-lysine,2-oxoglutarate 5-dioxygenase 3                                | 2.4.1.66  | PF03171        | 603066  | O60568     | GO:0001701 | 9582318 | 7q22.1           | NM_001084                                                                                                       |
| PLPP2   | phospholipid phosphatase 2                                                       | 3.1.3.4   | PF01569        | 607126  | O43688     | GO:0005515 | 8889548 | 19p13.3          | NM_177543,<br>NM_003712,<br>NM_177526                                                                           |
| TM7SF2  | transmembrane 7 superfamily member 2                                             | 1.3.1.70  | PF01222        | 603414  | O76062     | GO:0005515 | 9286704 | 11q13.1          | NM_001277233,<br>NM_003273                                                                                      |
