# Supplementary material for: Brain-wide transcriptome-based metabolic alterations in Parkinson's disease: human inter-region and human-experimental model correlations
Source: Royal Society of Chemistry journal article supplement (doi:10.1039/d2mo00343k), 2023-03-07
Supplement: d2mo00343k6.pdf [file d2mo00343k6.pdf]

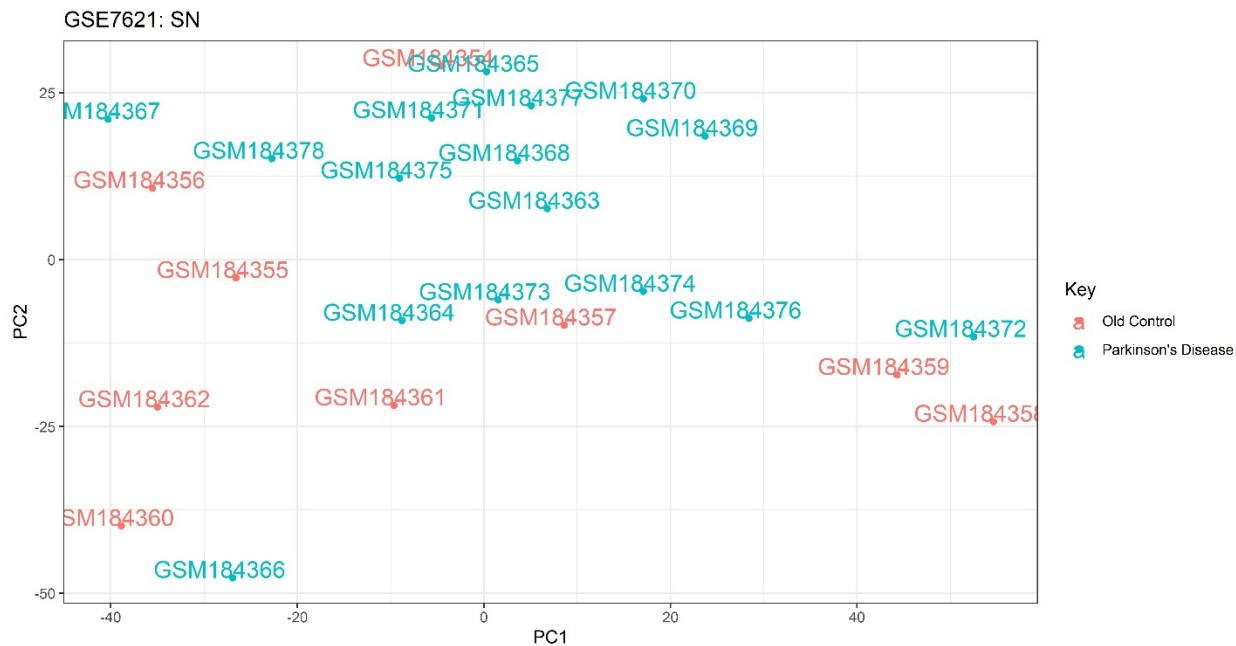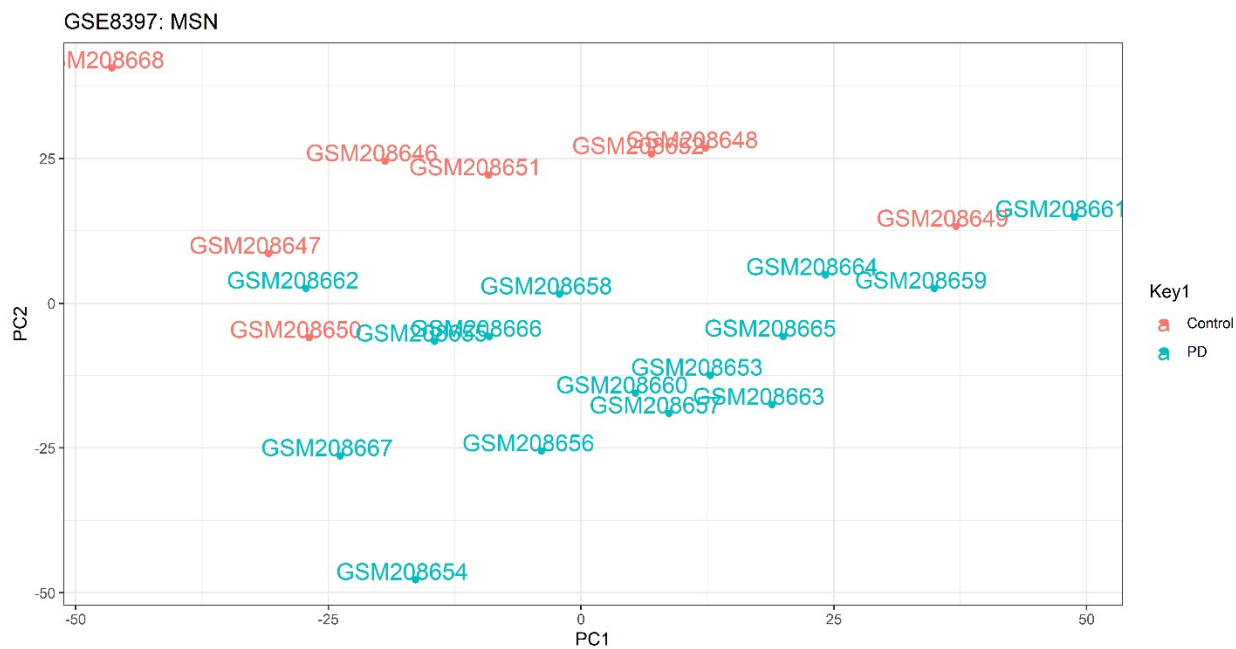

GSE8397: SN

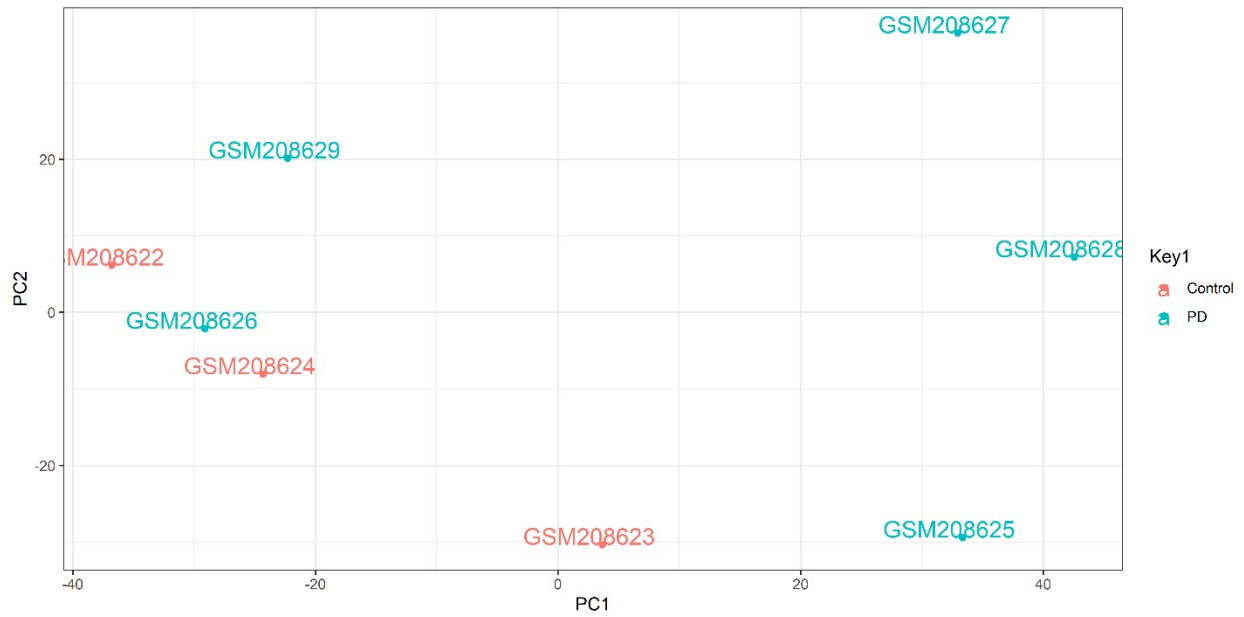

GSE19587: DON

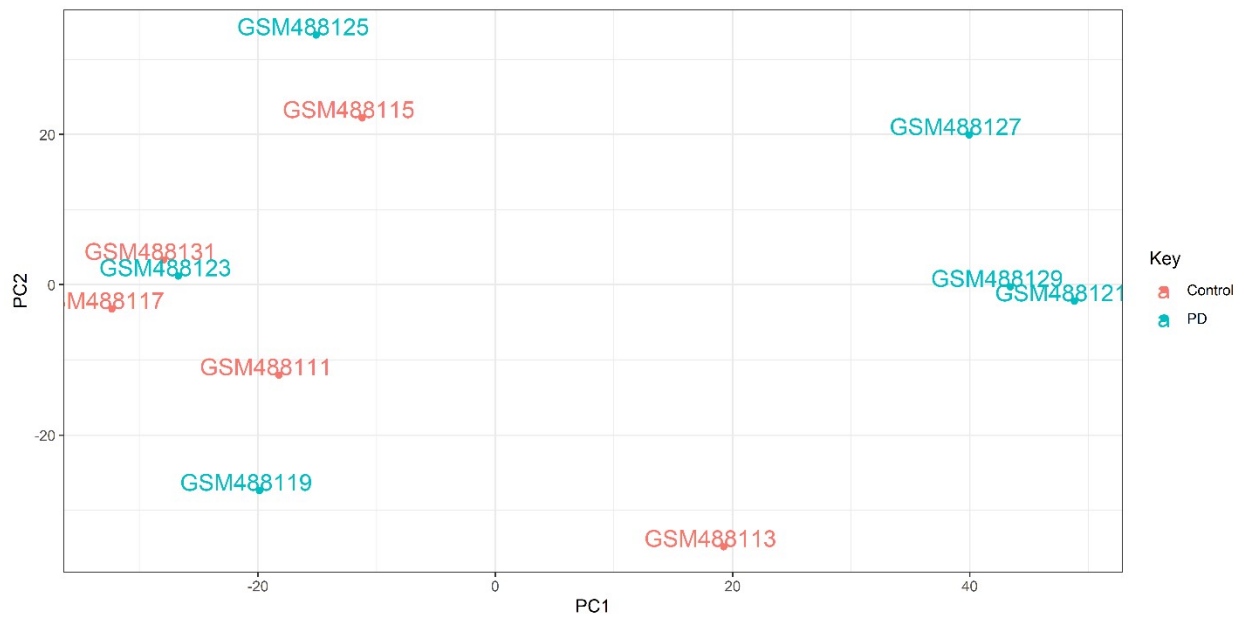

GSE19587: ION

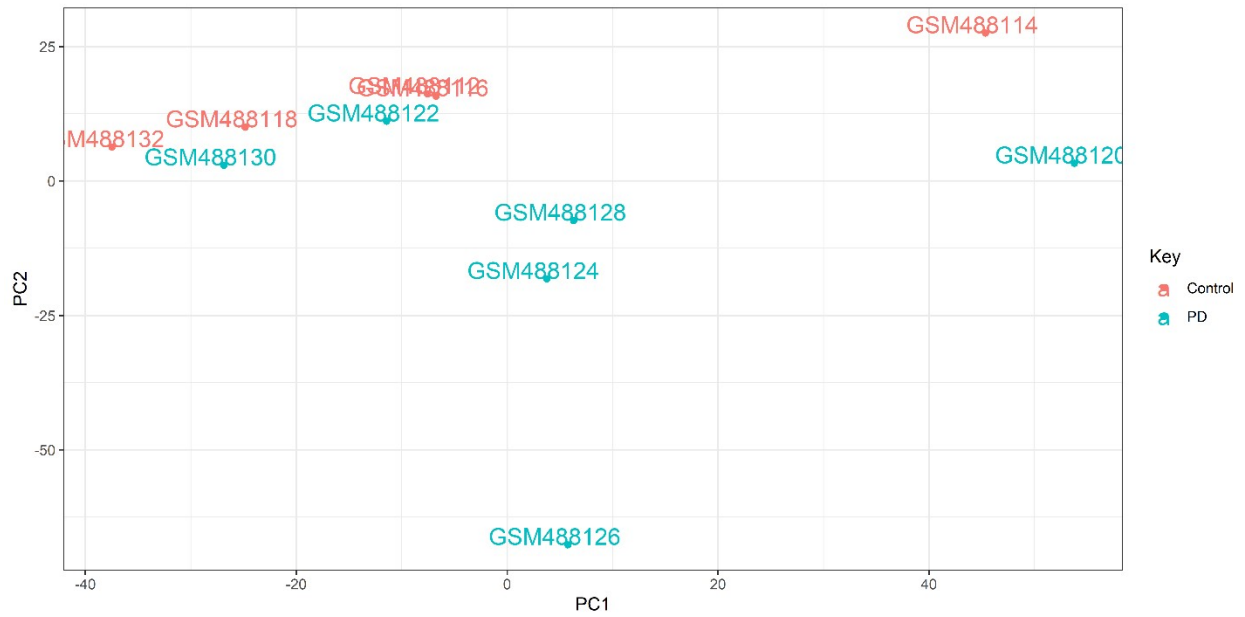

GSE20141: SN

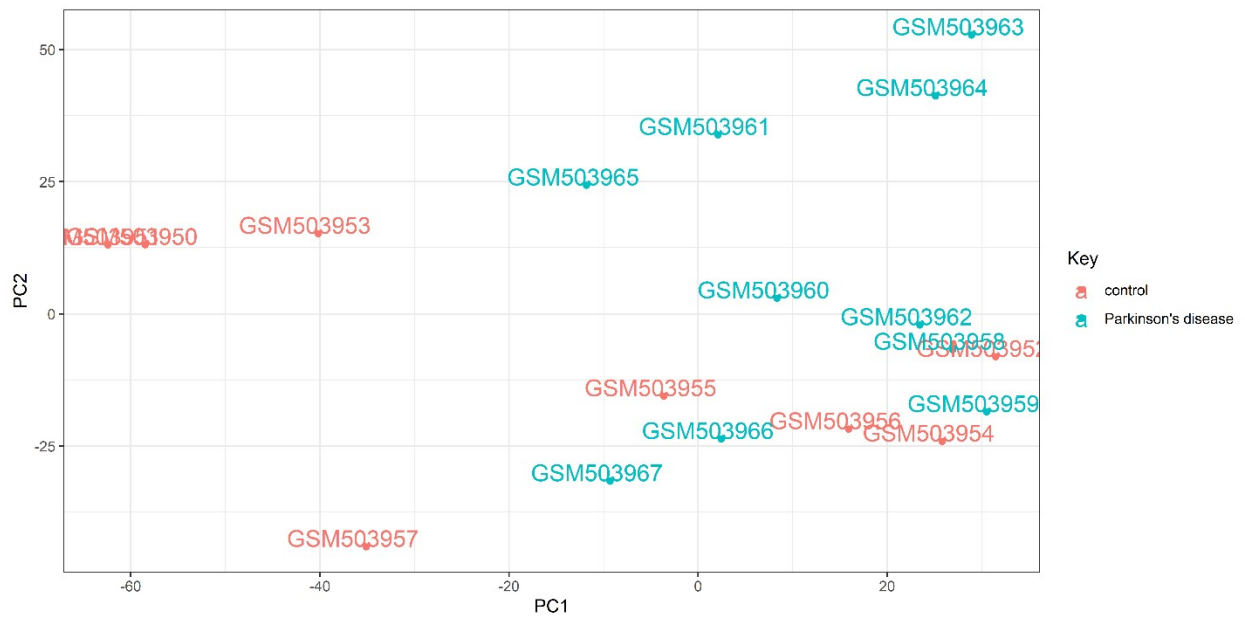

GSE20146: GPi

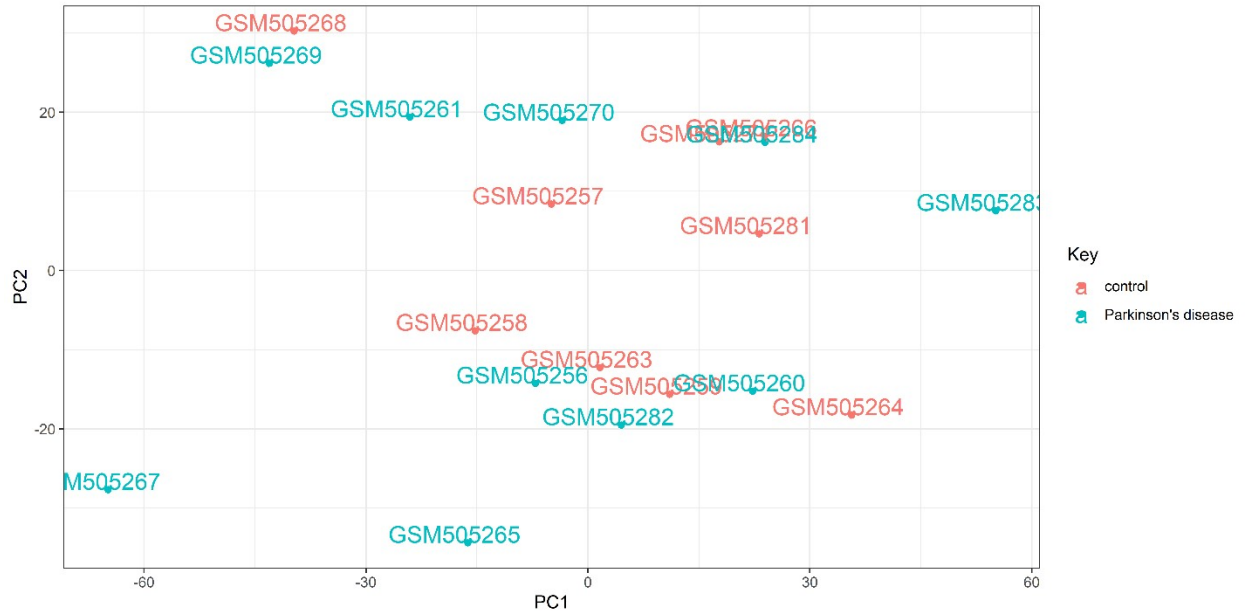

GSE20163: SN

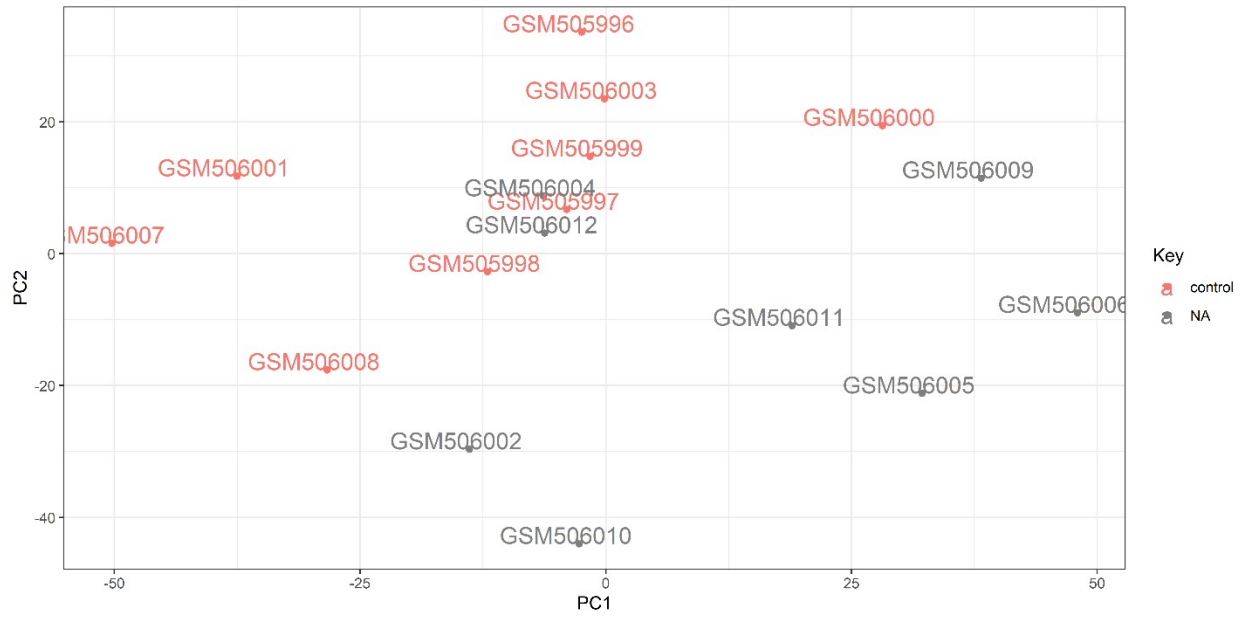

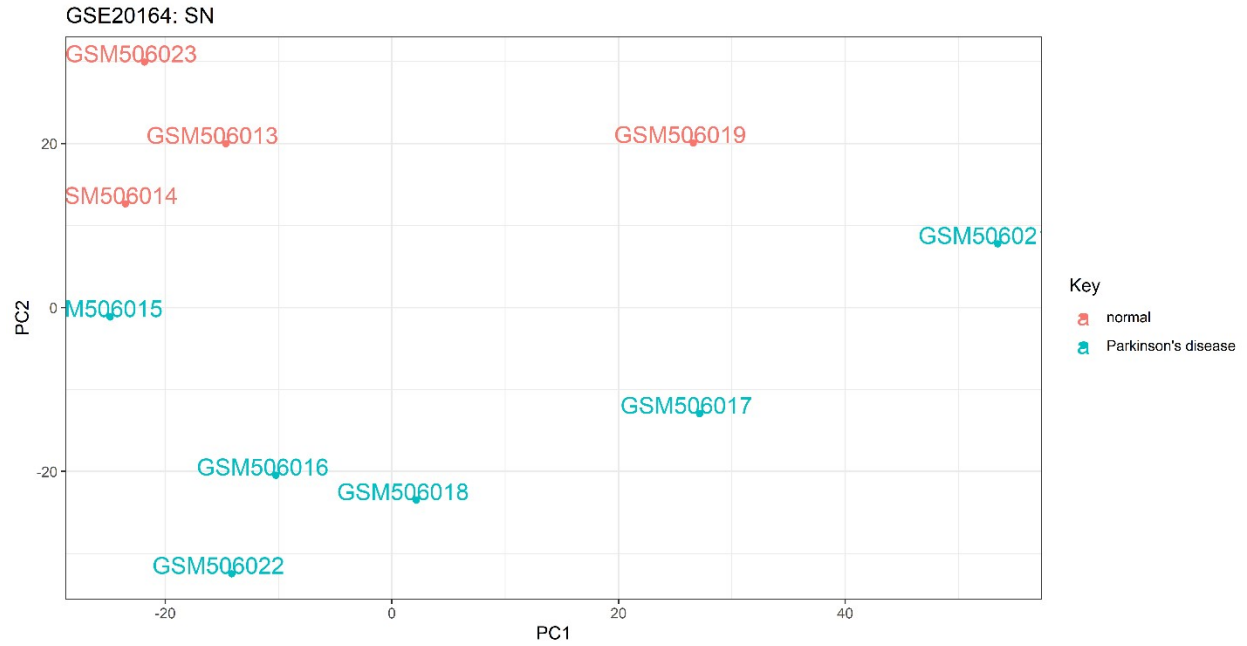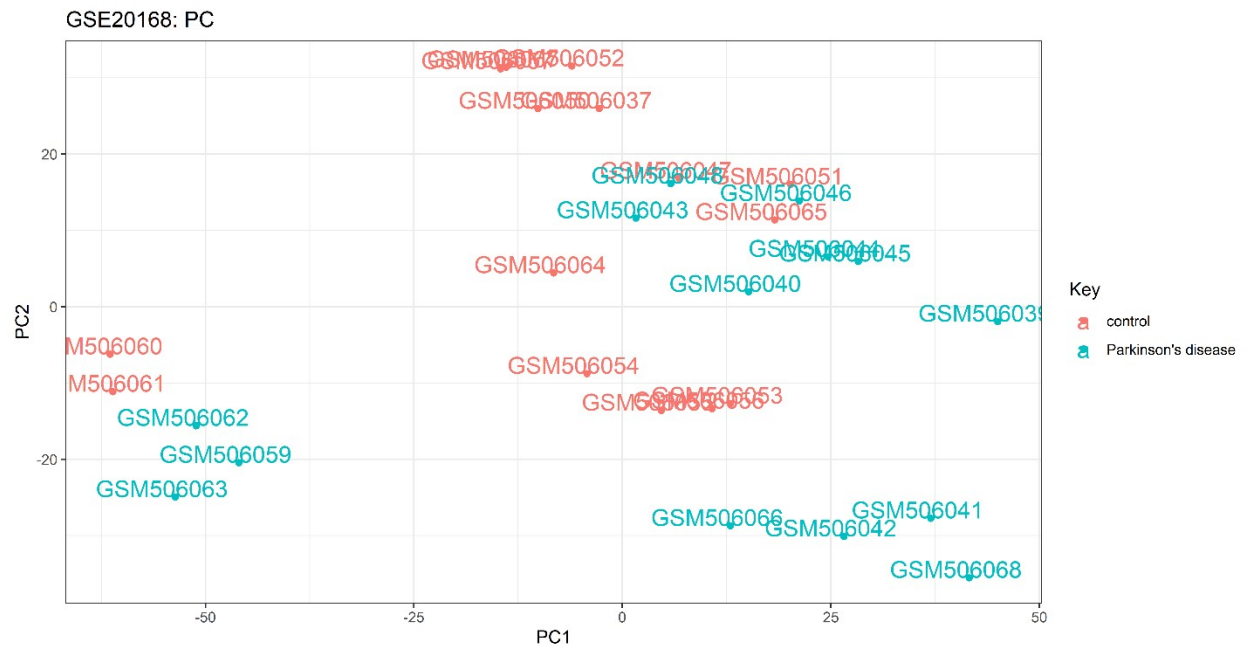

GSE20291: PUT

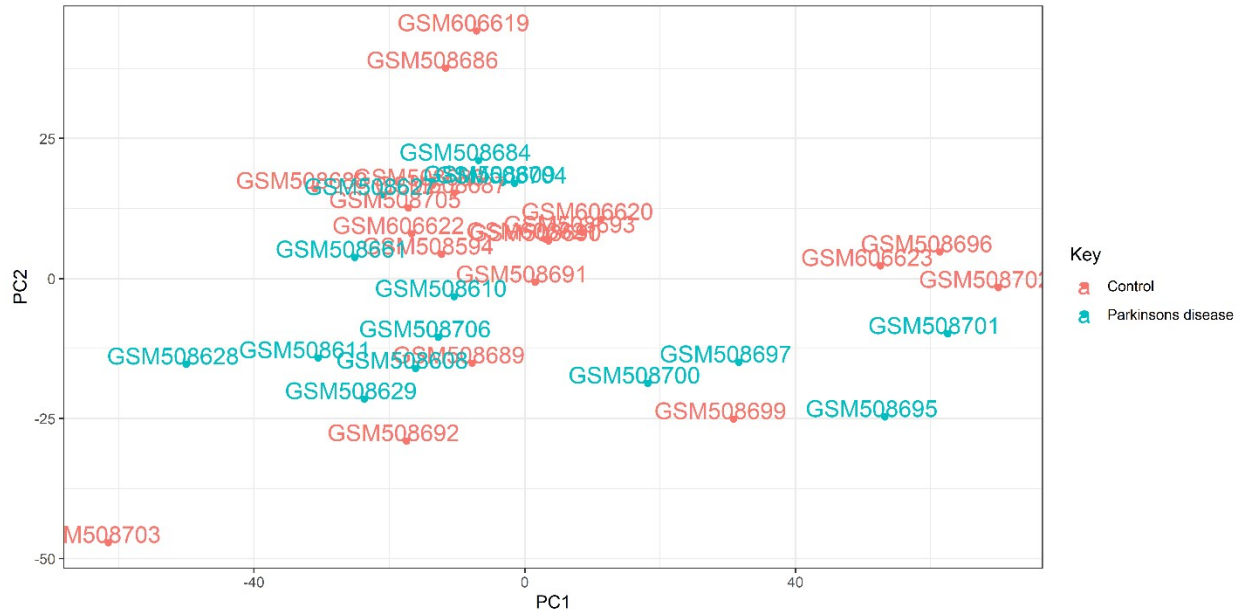

GSE20292: SN

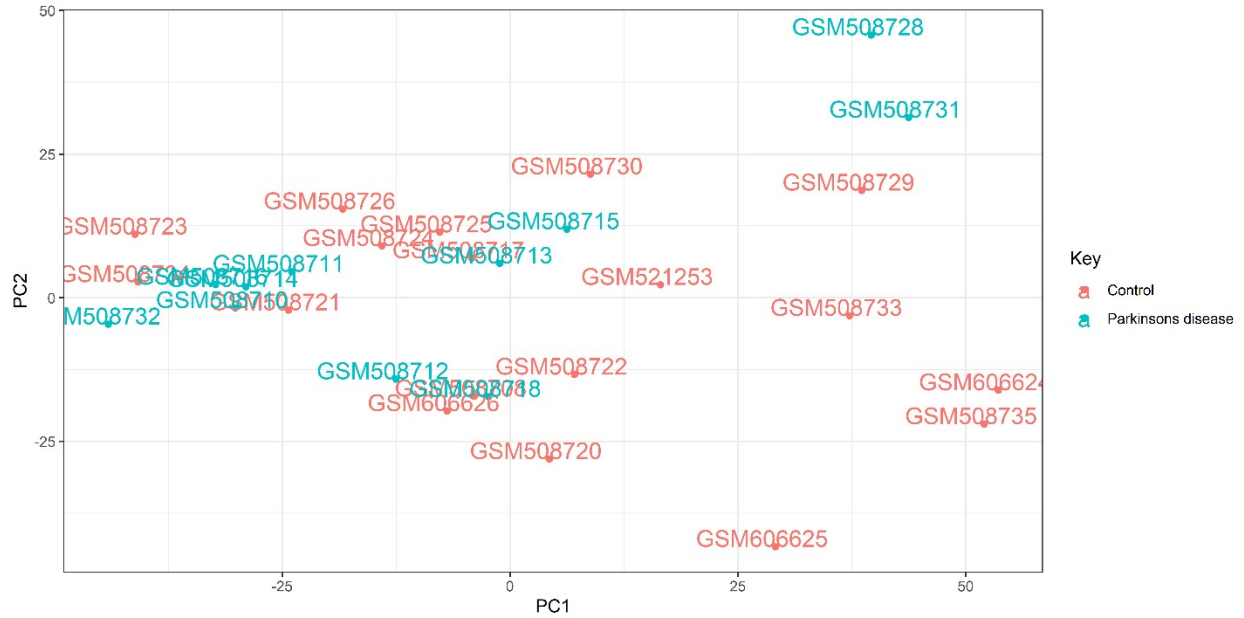

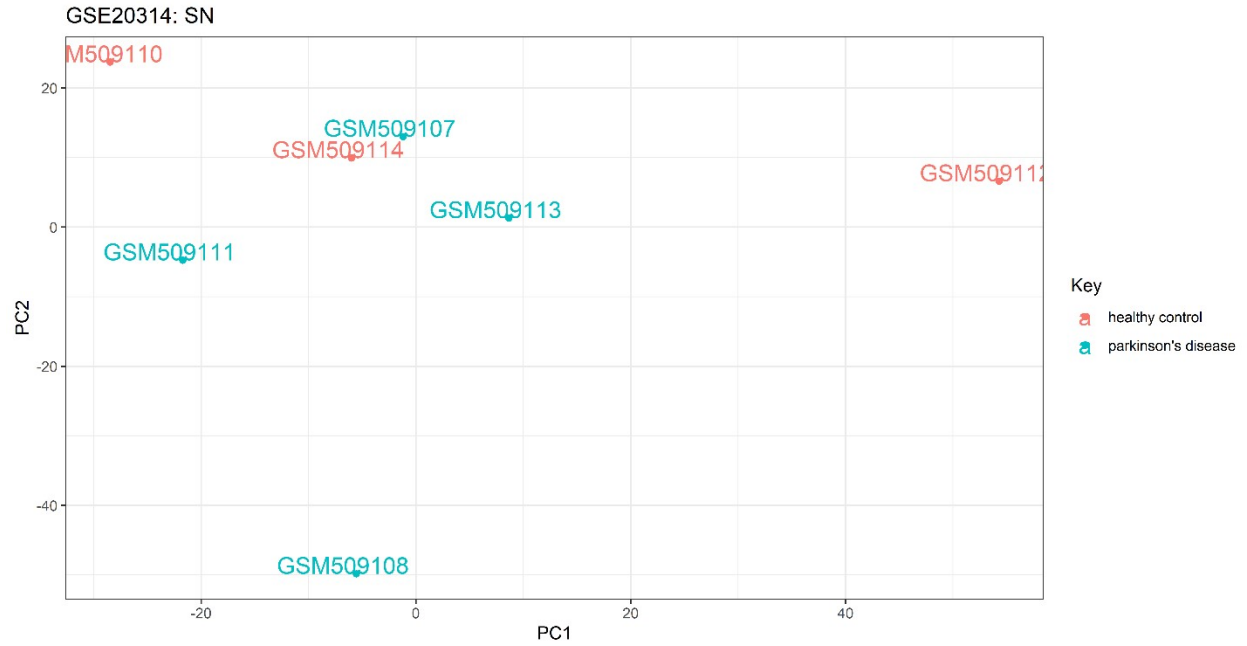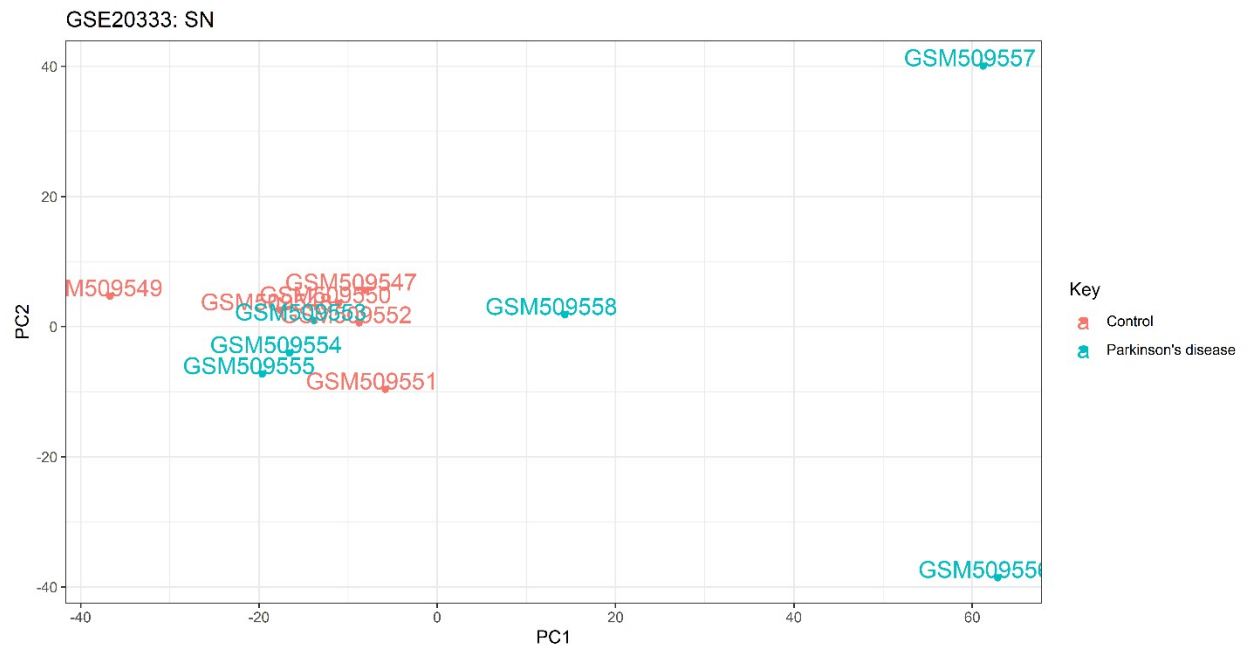

GSE23290: iPUT

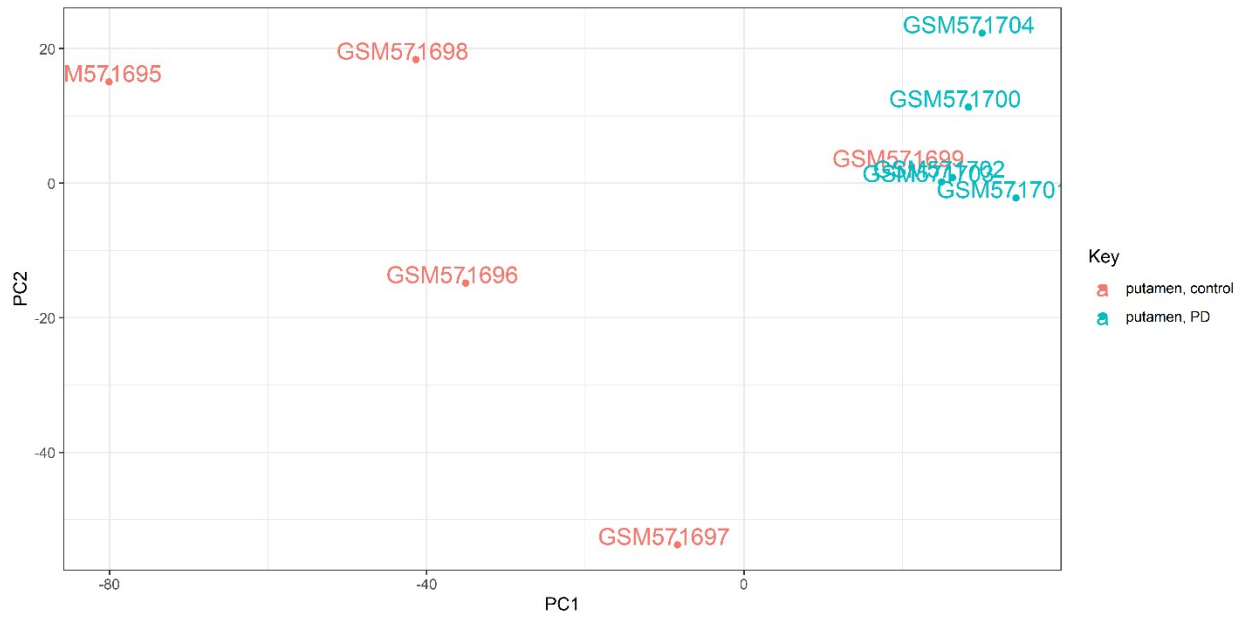

GSE23290: mPUT

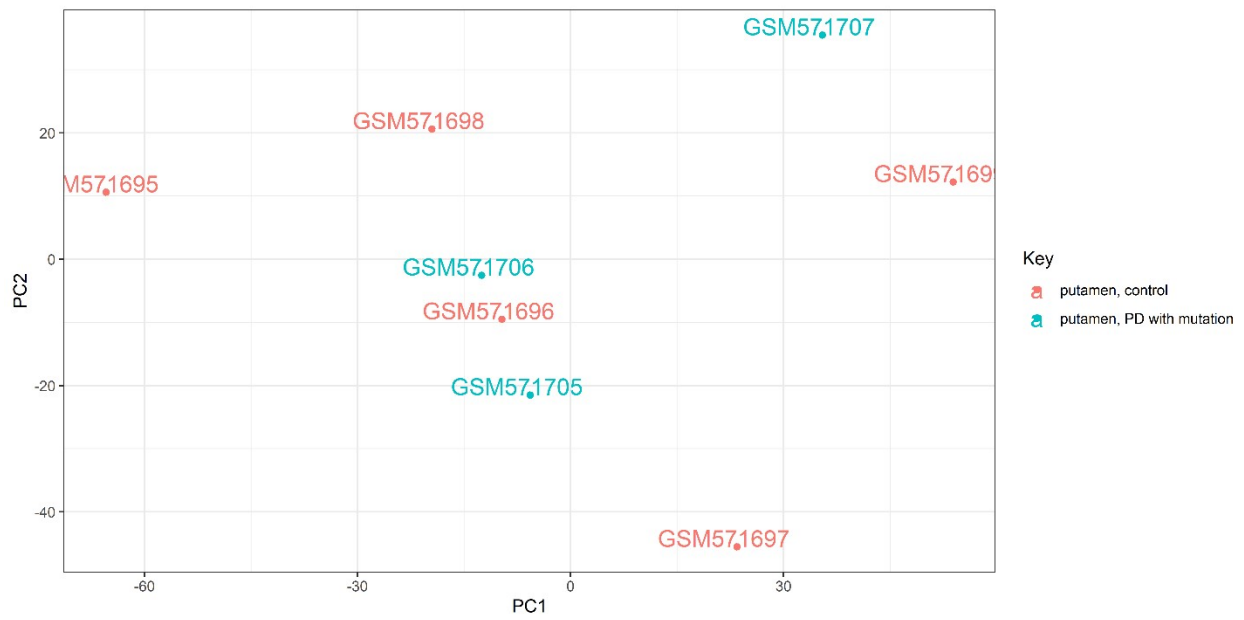



GSE24378: SN

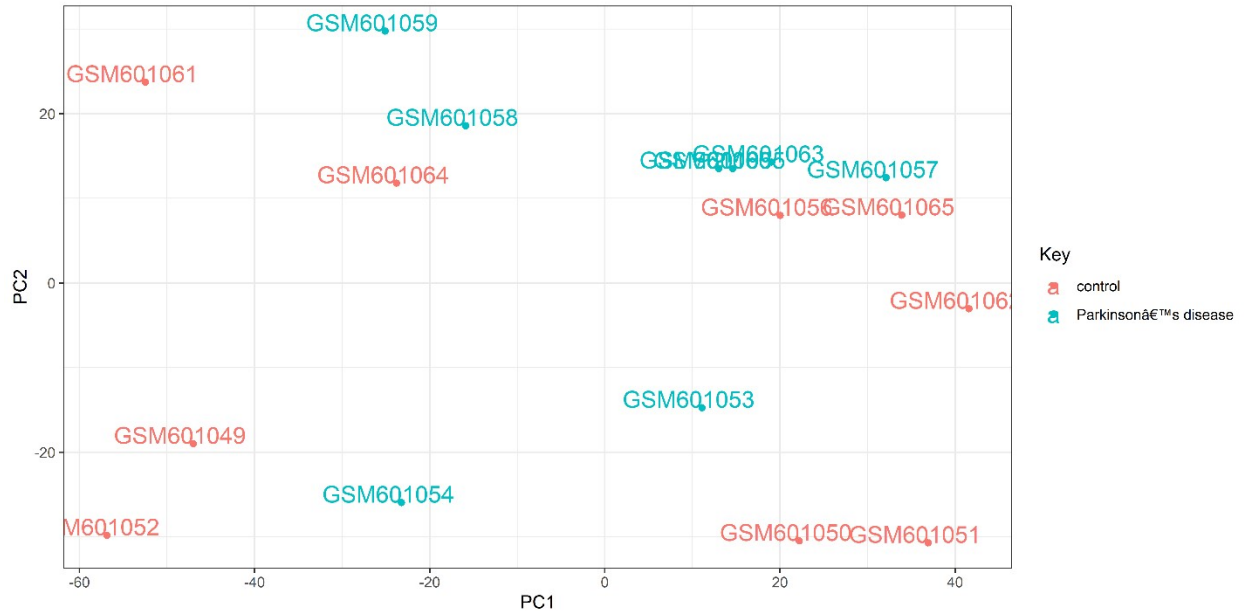

GSE26927: PC

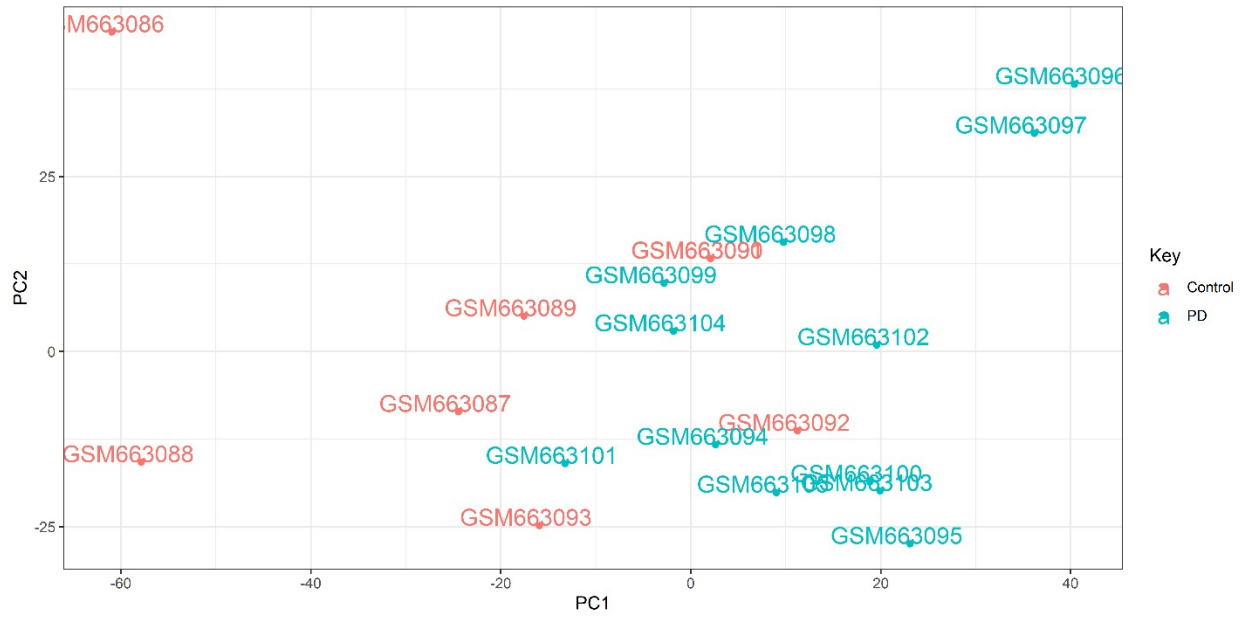

GSE26927: SN

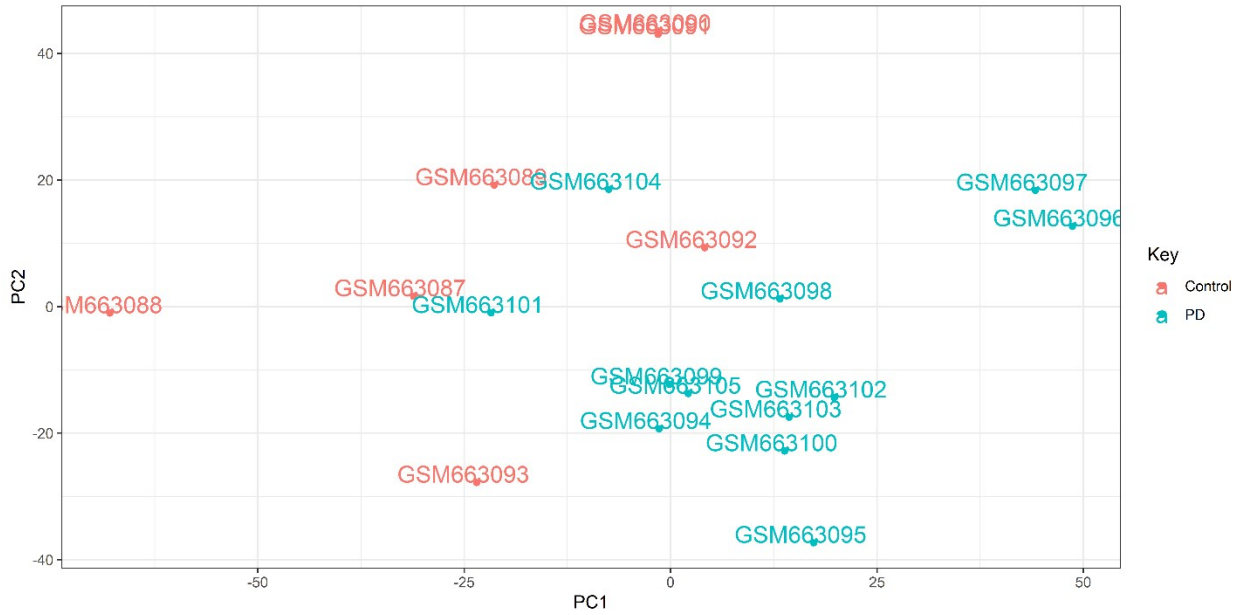

GSE28894: CB

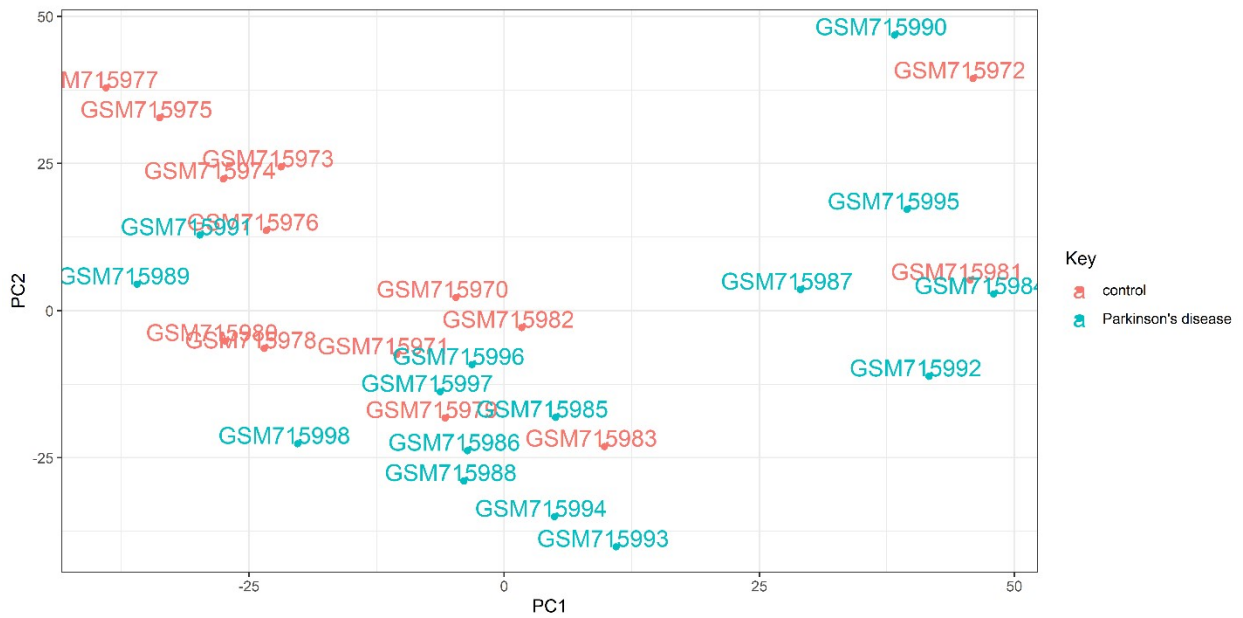

GSE28894: FCX

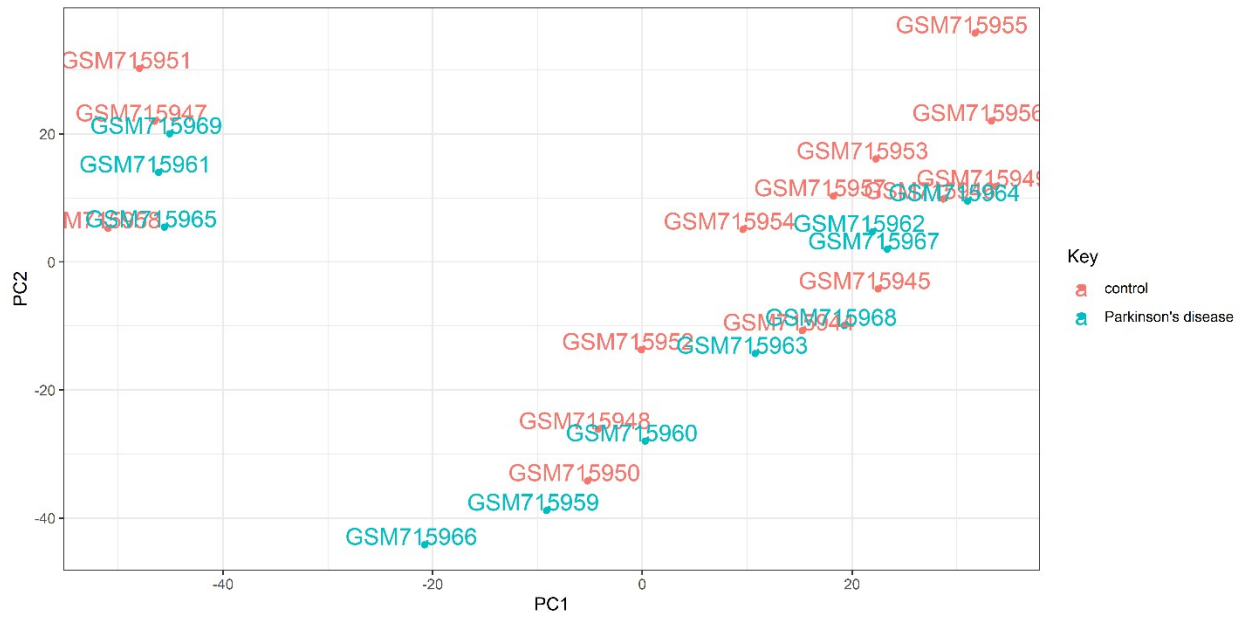

GSE28894: MED

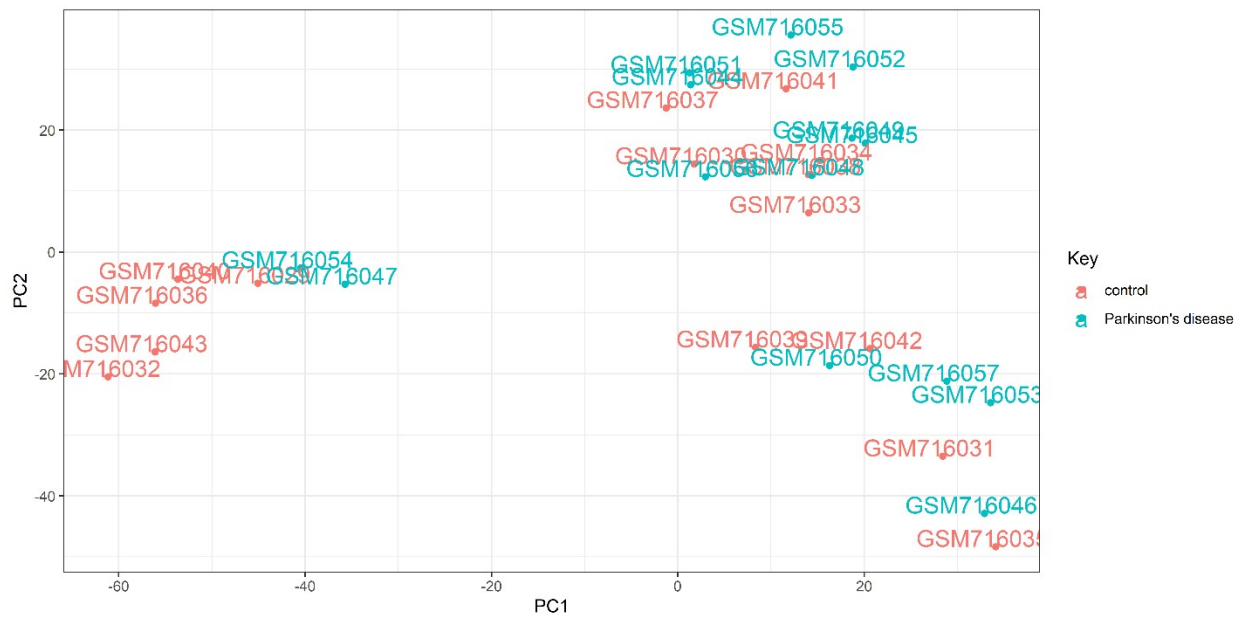

GSE28894: STR

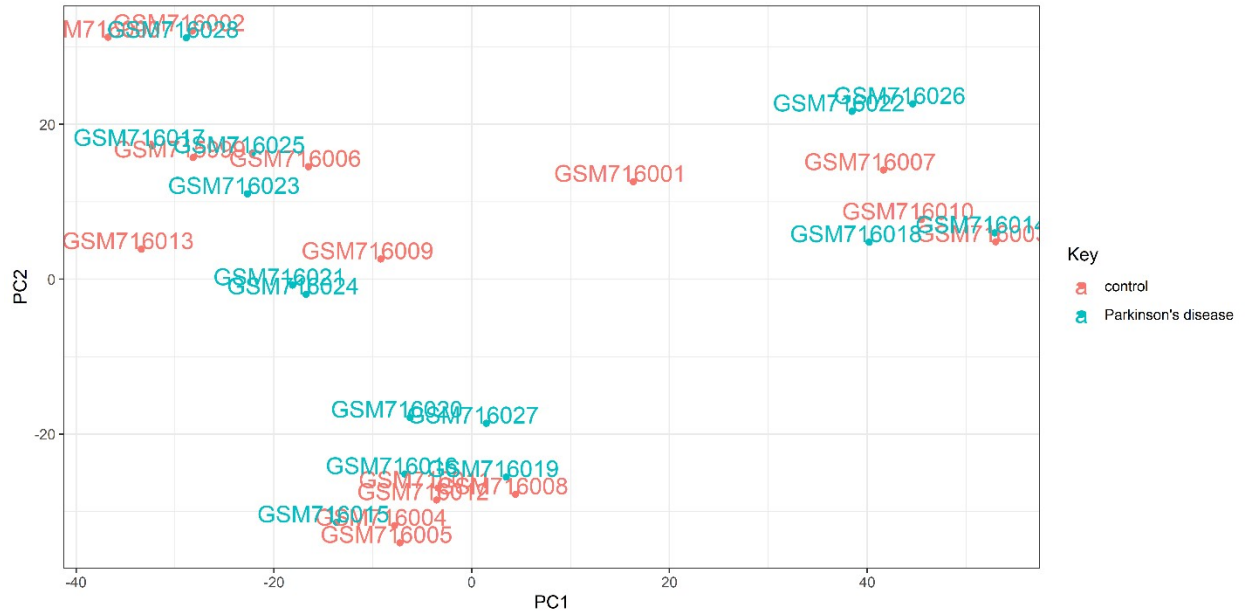

GSE34516: LOC

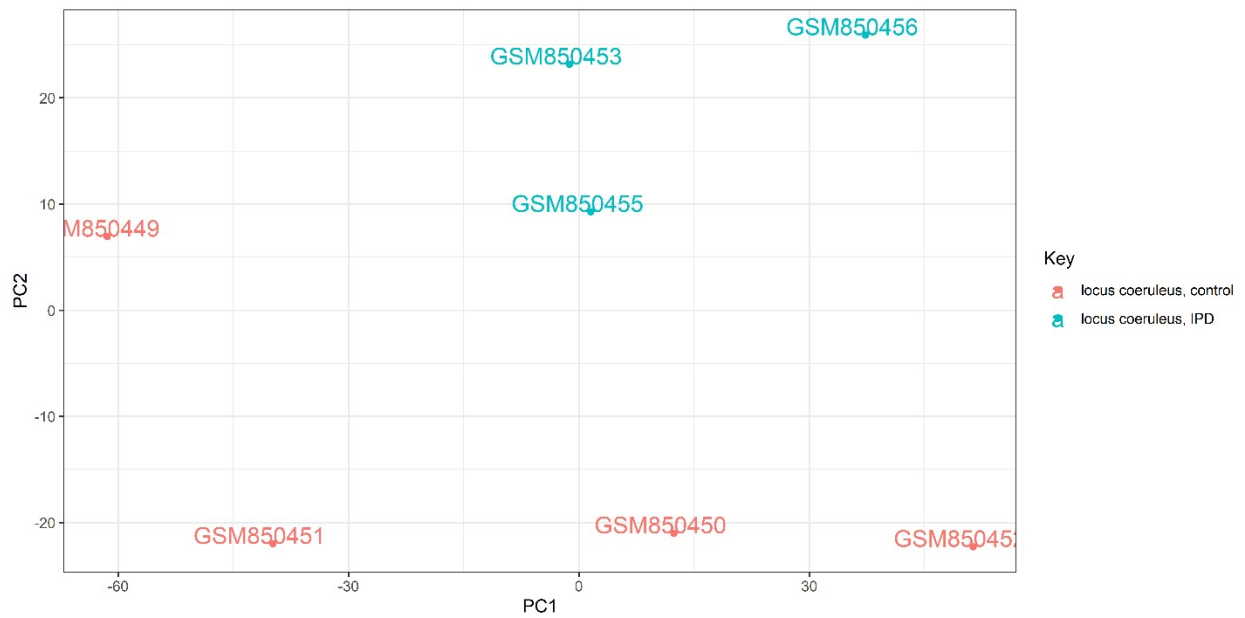

GSE49036: SN

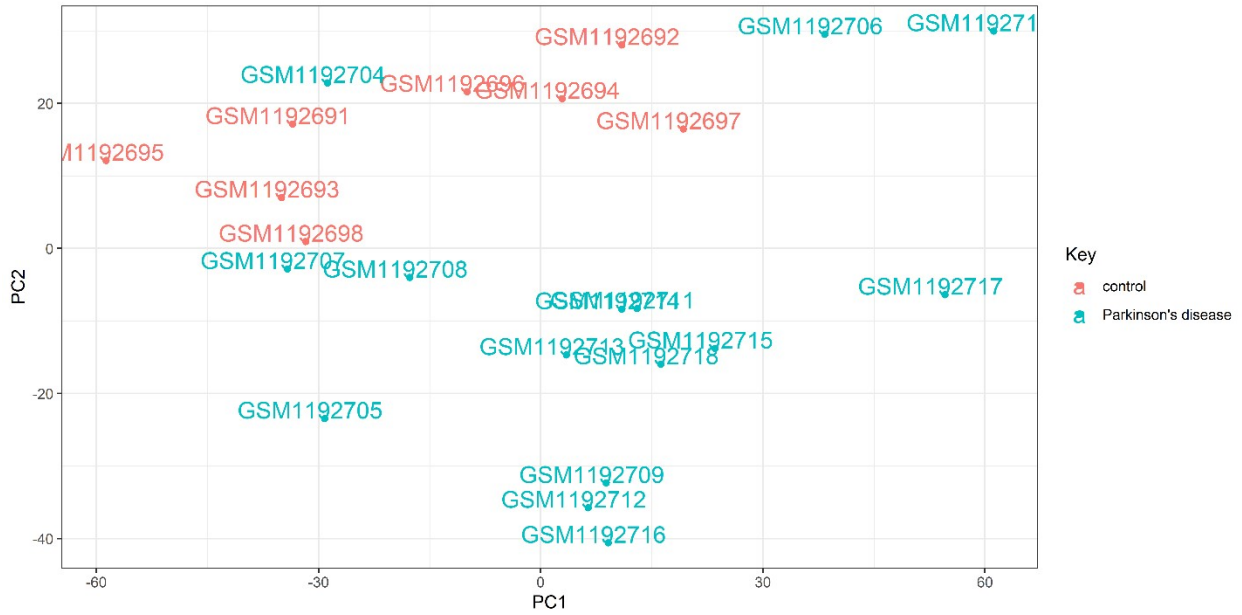

GSE54282: CO

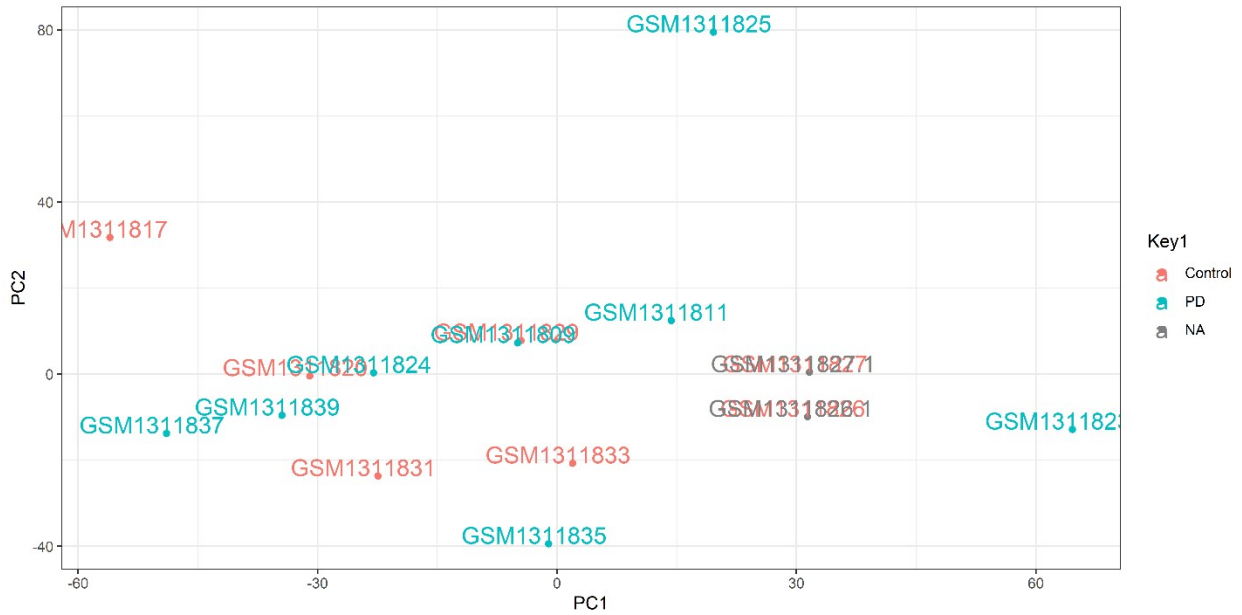

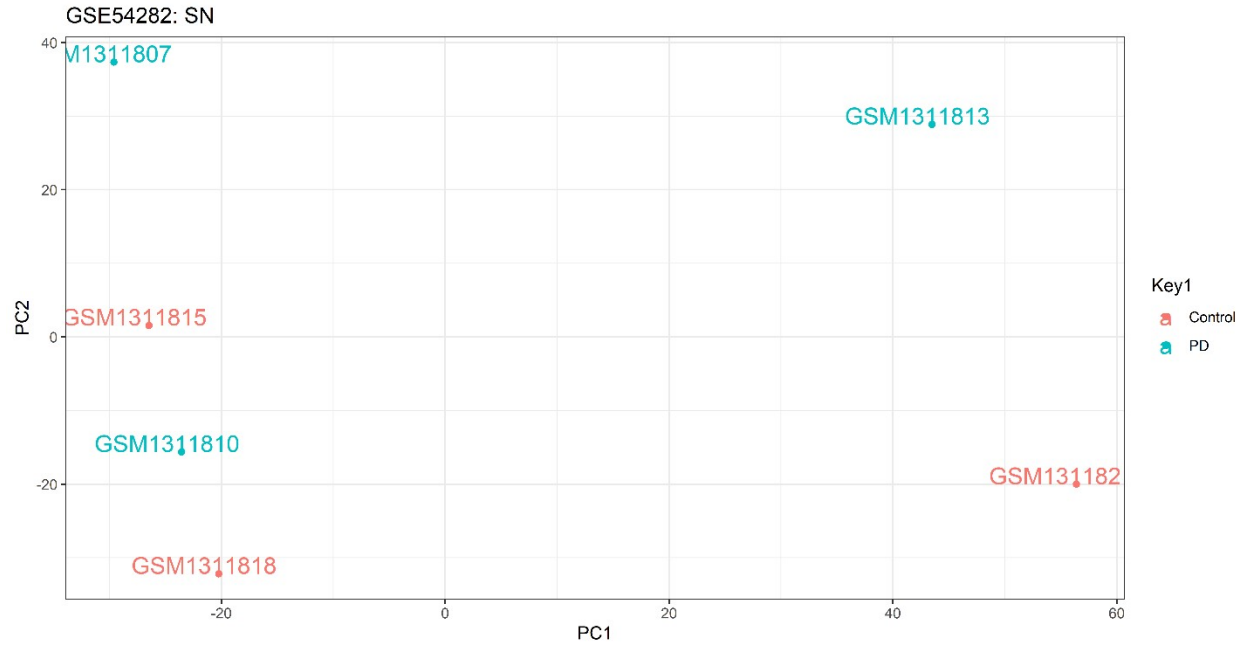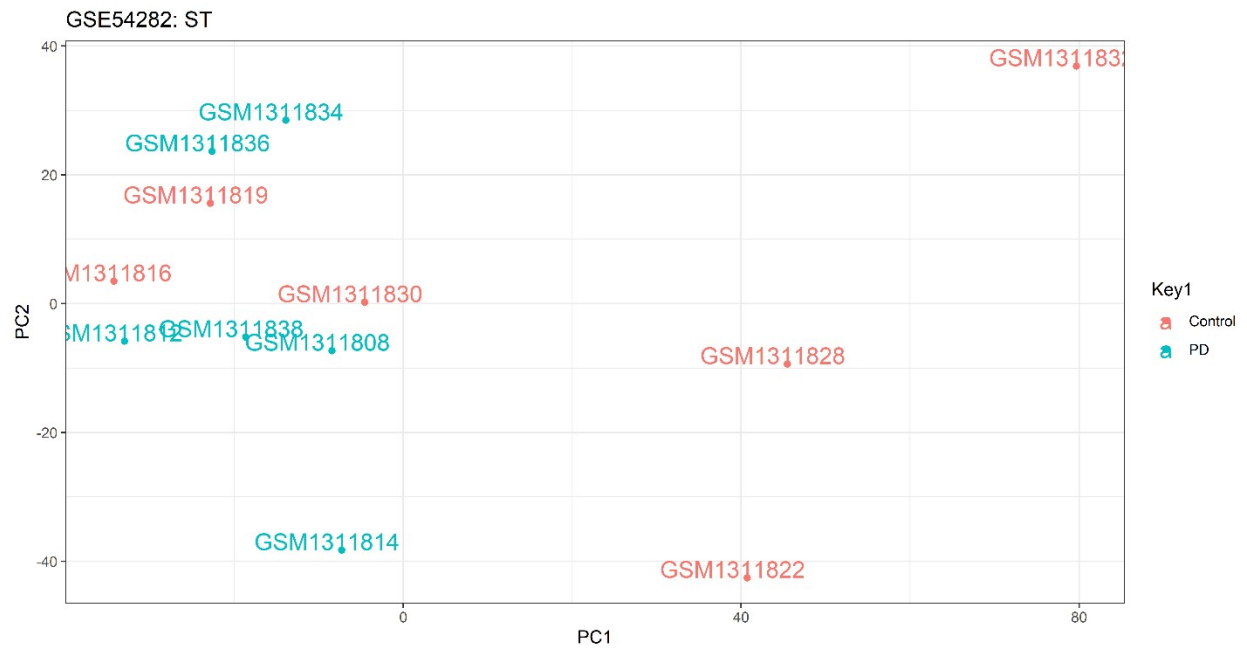

GSE114517: AM

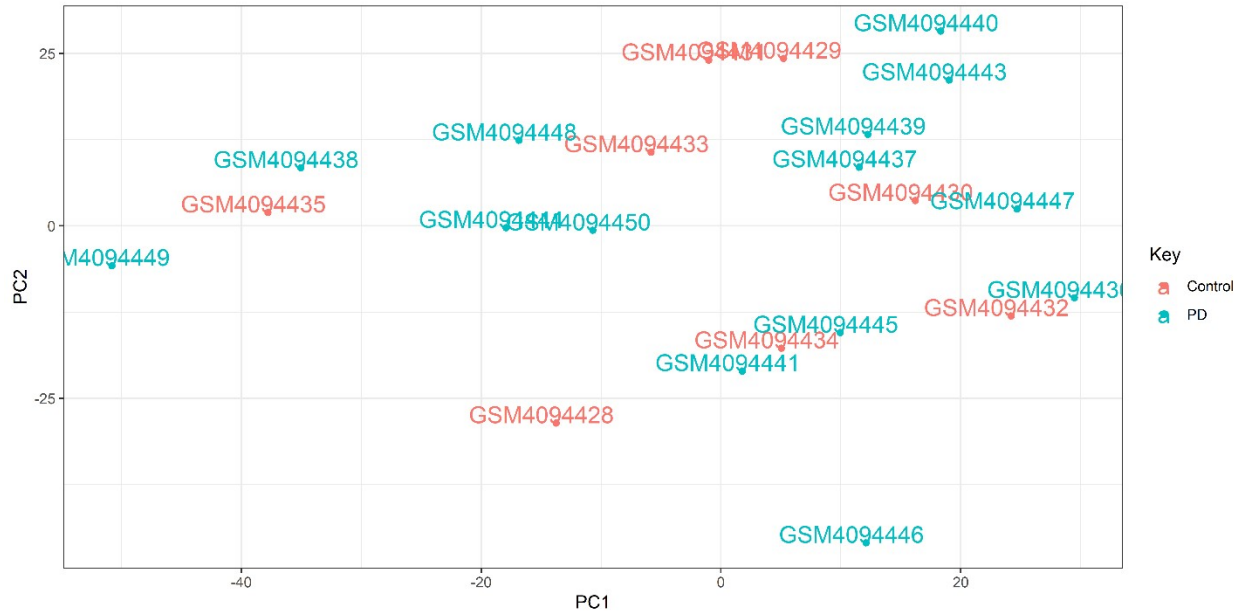

GSE114517: MTG

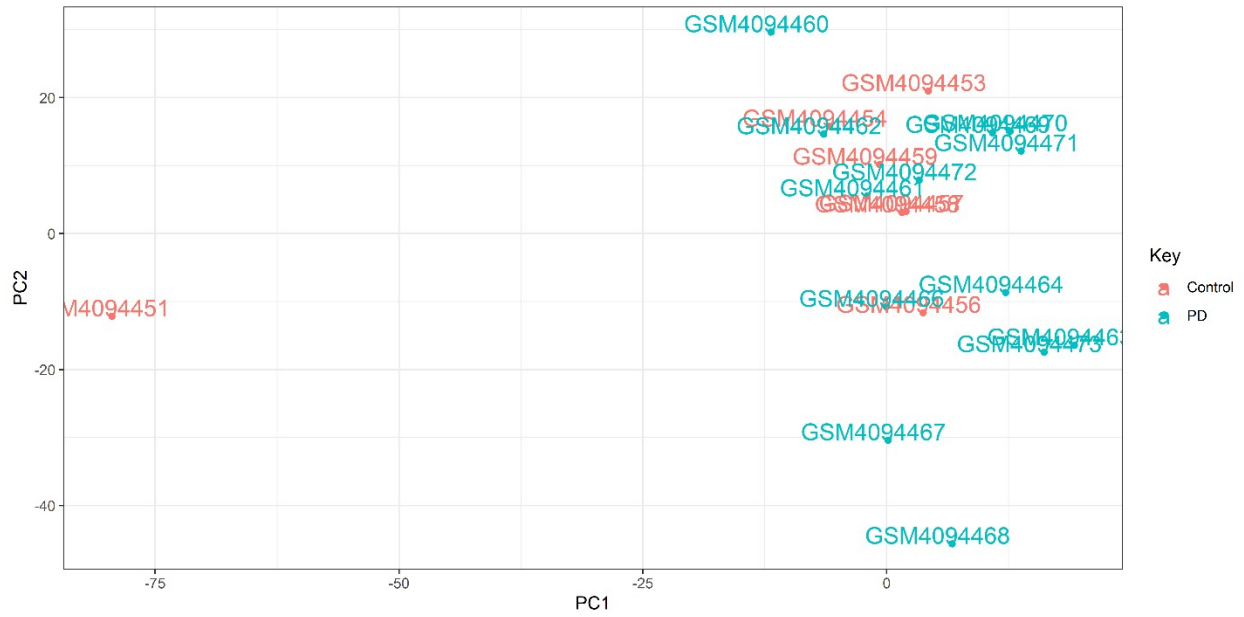

GSE114517: SN

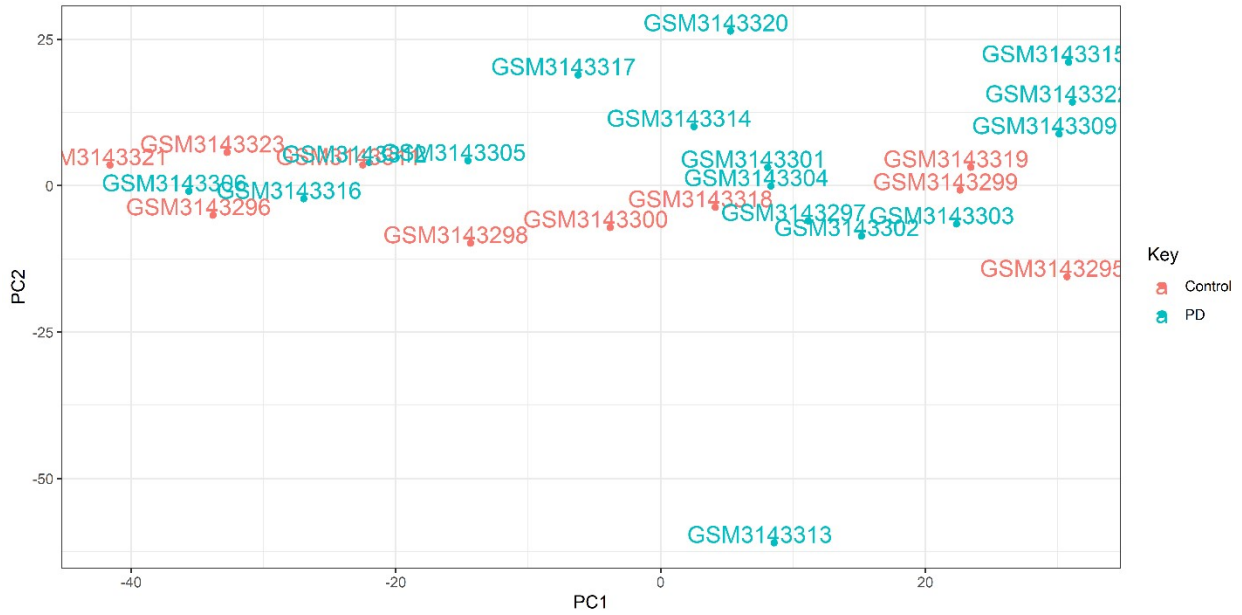

GSE135036: PCX

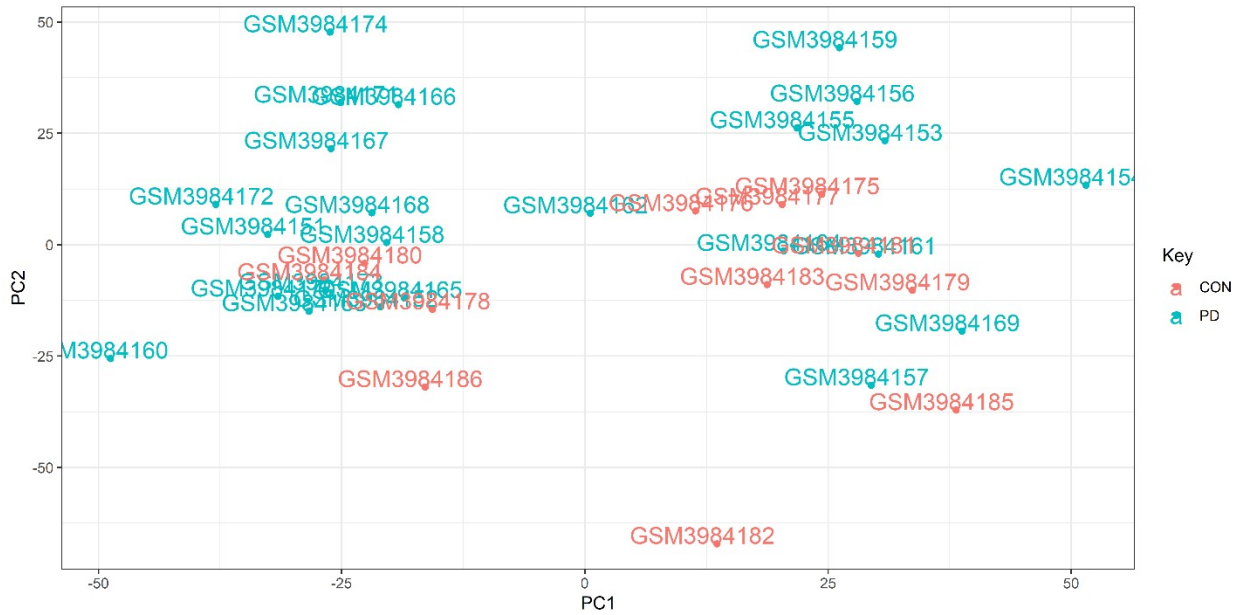



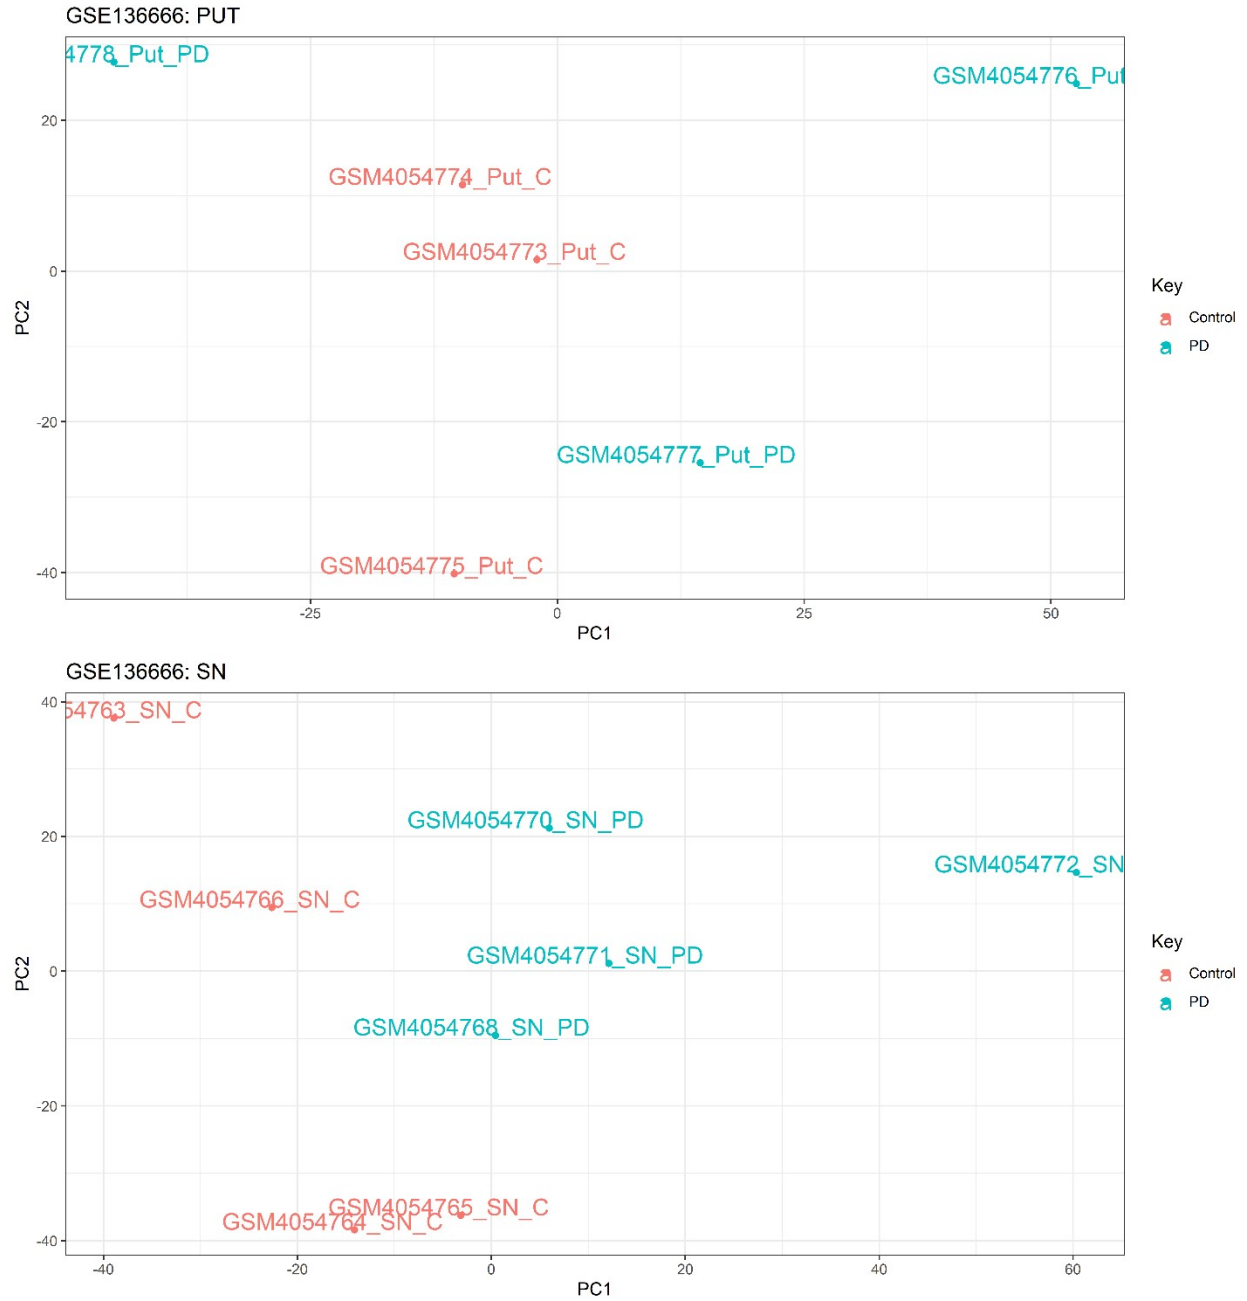

**Supplementary Figure 1:** PCA plots of the first two principal components performed on the human-derived transcriptome data.
